1 ***In vivo* characterisation of the toxicological properties of DPhP, one of the main**  
2 **degradation products of aryl phosphate esters.**

3 Samia Ruby<sup>1\*</sup>, Jesús Marín-Sáez<sup>2\*</sup>, Aurélie Fildier<sup>3\*</sup>, Audrey Buleté<sup>3</sup>, Myriam Abdallah<sup>1</sup>,  
4 Jessica Garcia<sup>4</sup>, Julie Deverchère<sup>1</sup>, Loïc Spinner<sup>3</sup>, Barbara Giroud<sup>3</sup>, Sébastien Ibanez<sup>5</sup>, Thierry  
5 Granjon<sup>5</sup>, Claire Bardel<sup>6,7</sup>, Alain Puisieux<sup>1</sup>, Béatrice Fervers<sup>1</sup>, Emmanuelle Vulliet<sup>3</sup>, Léa  
6 Payen<sup>1,4†</sup>, Arnaud M. Vigneron<sup>1†</sup>

7 *1 Université de Lyon, Université Claude Bernard Lyon 1, INSERM 1052, CNRS 5286, Centre Léon Bérard,*  
8 *Cancer Research Center of Lyon, Equipe Labellisée Ligue contre le Cancer, Lyon, France.*

9 *2 Department of Chemistry and Physics, Analytical Chemistry Area, University of Almería, Research Centre for*  
10 *Agricultural and Food Biotechnology (BITAL), Agrifood Campus of International Excellence ceiA3, Carretera de*  
11 *Sacramento s/n, E-04120 Almería, Spain*

12 *3 Université de Lyon, Institut des Sciences Analytiques, UMR 5280 CNRS, Université de Lyon, Université de*  
13 *Lyon 1, ENS-Lyon, 5 rue de la Doua, 69100 Villeurbanne, France*

14 *4 Université de Lyon, Université Claude Bernard Lyon 1, Hospices Civils de Lyon, Centre Hospitalier Lyon–Sud,*  
15 *Biochemistry, pharmacotoxicology, and molecular biology department, Pierre Bénite, France*

16 *5 Université de Lyon, Université Claude Bernard Lyon 1, CNRS, Molecular and Supramolecular Chemistry and*  
17 *Biochemistry Institute ICBMS UMR 5246, F-69622 Lyon, France*

18 *6 Department of biostatistics, Hospices Civils de Lyon, Lyon, France*

19 *7 Université de Lyon, Université Lyon 1, CNRS, Laboratoire de Biométrie et Biologie Evolutive UMR 5558, F-*  
20 *69622 Villeurbanne, France*

21 \*These authors contribute equally to this work

22 † To whom correspondence should be addressed: Léa Payen- Arnaud M. Vigneron.

23 [\\_lea.payen@univ-lyon1.fr](mailto:_lea.payen@univ-lyon1.fr)

24 [\\_arnaud.vigneron@lyon.unicancer.fr](mailto:_arnaud.vigneron@lyon.unicancer.fr)

25

## 26 **Background:**

27 Aryl phosphate esters (APEs), a main class of organophosphorus ester molecules, are widely used  
28 and commonly present in the environment. Health hazards associated with these compounds  
29 remain largely unknown and the effects of diphenyl phosphate (DPhP), one of their most frequent  
30 derivatives in human samples, are poorly characterised.

## 31 **Objective:**

32 Our aim was to investigate whether DPhP *per se* may represent a more relevant marker of  
33 exposure to APEs and determine its potential deleterious biological effects in chronically exposed  
34 mice.

## 35 **Methods:**

36 Conventional animals (FVB mice) were acutely (intravenous or oral gavage) or chronically (0.1  
37 mg.mL<sup>-1</sup>, 1 mg.mL<sup>-1</sup>, 10 mg.mL<sup>-1</sup> in drink water) exposed to relevant doses of DPhP or triphenyl  
38 phosphate (TPhP), one of its main precursors in the environment. Both molecules were measured  
39 in blood and other relevant tissues by liquid chromatography-mass spectrometry (LC-MS).  
40 Biological effects of chronic DPhP exposure were addressed through liver multi-omics analysis  
41 combining mRNA extraction and sequencing to high resolution LC-MS to determine the  
42 corresponding metabolic profile. Deep statistical exploration was performed to extract correlated  
43 information, guiding further physiological analyses (immunohistochemistry (IHC) and animal growth  
44 measurement).

## 45 **Results:**

46 Acute and chronic exposure to DPhP led to significant levels of this molecule in blood and other  
47 tissues, an effect missing with TPhP. Multi-omics analysis confirmed the existence of biological  
48 effects of DPhP, even at a very low dose of 0.1 mg.mL<sup>-1</sup> in drinking water. Chemical structural  
49 homology and pathway mapping demonstrated a clear reduction of the fatty-acid catabolic  
50 processes centred on acylcarnitine and mitochondrial  $\beta$ -oxidation. Interestingly, mRNA expression  
51 confirmed and extended these observations by demonstrating at all tested doses the overall  
52 repression of genes involved in lipid catabolic processes and regulated by PPAR $\alpha$ , a master  
53 regulator of  $\beta$ -oxidation and its associated ketogenesis. IHC analysis confirmed the alteration of  
54 these pathways by showing a specific downregulation of Hmgcs2, a kernel target gene of PPAR $\alpha$ ,  
55 at all doses tested, and surprisingly, a strong reduction of the lipid droplet content only at the highest  
56 dose. Overall, DPhP absorption led to weight loss, which was significant using the highest dose.

## 57 **Conclusions:**

58 Our results suggest that in mice, the effects of chronic exposure to DPhP, even at a low dose, are  
59 not negligible. Fatty acid metabolism in the liver in particular is essential for controlling fast and  
60 feast periods with adverse consequences on the overall physiology. Therefore, the impact of DPhP  
61 on circulating fat, cardiovascular and metabolic disease incidence deserves, in light of our results,  
62 further investigations.

63

## 64 1. Introduction

65 Di-phenyl phosphate (DPhP) has been used as a main biomarker for assessing exposure to aryl  
66 phosphate esters (APEs), especially tri-phenyl phosphate (TPhP), a molecule suspected of  
67 presenting human health hazards. However, this degradation compound can be produced from  
68 several APEs including ethylhexyl di-phenyl phosphate (EHDPHP) or the resorcinol  
69 bis(diphenyl phosphate) (RDP)<sup>1,2</sup> and tert-butylphenyl diphenyl phosphate (BPDP)<sup>3</sup>. Moreover,  
70 DPhP itself is largely present in the environment worldwide<sup>4-8</sup>, either owing to its  
71 spontaneous/microorganism production from known APEs<sup>5,9</sup>, or to its direct use in industry<sup>10</sup>.  
72 Most APEs are used as flame retardants. They are added to consumer products and raw  
73 materials to delay combustion and meet flammability standards such as the ISO/TC92 Fire  
74 Safety, TC89 Fire Hazard existing in Europe. Moreover, unlike other flame retardants, TPhP  
75 and EHDPHP are also largely used as plasticizer and lubricants in hydraulic fluids, rubber,  
76 paints, textile coatings, food packaging and PVC, drastically increasing their presence in the  
77 environment. These compounds are not usually covalently linked to plastic materials and can  
78 easily leach into the environment<sup>11</sup>. High vapour pressure of TPhP is also likely to facilitate its  
79 release in the air once it is freed from its original material<sup>12</sup>. Not surprisingly, TPhP and  
80 EHDPHP are thus ubiquitous components of the human indoor environment where its sources  
81 and exposure pathways are quite diverse and heterogeneous with regards to other flame  
82 retardants. Indeed, TPhP and EHDPHP quantification in food, house dust, water or air has  
83 systematically demonstrated their presence in these very different matrices raising awareness  
84 on the safety of these compounds<sup>4-8,12,13</sup>. A study characterising the direct biological effects of  
85 DPhP and their relationship to TPhP exposure thus appeared to be of particular relevance to  
86 better define the effects and mechanisms of action associated with exposure to APEs in a more  
87 comprehensive way.

88 Historically, DPhP was believed to be produced from TPhP in the liver by oxidase and aryl  
89 esterase<sup>14</sup>. However, more recent analyses obtained from *in vitro* cultured hepatocytes, revealed  
90 that the main metabolites derived from TPhP were hydroxylated and glucuronated forms of  
91 TPhP<sup>15</sup>. Importantly, these metabolites and their equivalents for EHDPHP have recently been  
92 detected in human urine samples<sup>16</sup>, although DPhP remained the most abundant metabolite in  
93 these samples. This indicates either that degradation of APEs does not primarily occur in the  
94 human liver, or that APEs are rapidly degraded and absorbed as DPhP by the environment.  
95 Finally, the presence of DPhP in the environment could be directly due to its importance as a  
96 catalyst in polymerisation processes.

97 In line with these hypotheses, a recent study showed that serum hydrolase significantly  
98 contributes to TPhP and EHDPHP clearance and production of DPhP<sup>17</sup>. Bacteria present in the  
99 environment and the microbiota are likely to participate in this type of transformation since  
100 bacterial metabolism is able to fully degrade TPhP, DPhP initially being the main metabolite  
101 released in the biofilm<sup>18</sup>. Similarly, microsomal preparation of human skin demonstrated the  
102 ability of carboxylesterases to efficiently generate DPhP from TPhP<sup>19</sup>, indicating that likelihood  
103 of TPhP to reach subcutaneous fat and blood through this route of exposure is very low. Rapid  
104 detection of DPhP in urine samples of women exposed to TPhP through nail polish tends to  
105 confirm this hypothesis<sup>20</sup>. Finally, DPhP concentrations in the environment are strongly  
106 correlated with TPhP levels present in the same environment<sup>4</sup>, hence raising concerns about  
107 these potentially hazardous molecules for human health.

108 The complexity of the routes of exposure described above can cast doubts as to the  
109 relevance of *in vitro* and *in vivo* studies describing the toxicities associated with APEs such as  
110 the TPhP. For instance, very high doses of TPhP administered via oral gavage (300 mg/kg/day)  
111 in adult mice<sup>21</sup> or through direct subcutaneous injection (around 200 µg/kg/day) in  
112 embryo/pups<sup>22</sup> may artificially expose the organism to an irrelevant dose of TPhP and its

113 hydroxylated forms, thus misrepresenting the more common route of DPhP exposure when  
114 APEs are present in the environment. These types of protocols have mainly led to the conclusion  
115 that TPhP has an obesogenic endocrine disrupting activity. These conclusions were reinforced  
116 *in vitro* by studies showing that high doses (10-100  $\mu$ M) of TPhP can disturb the activity of the  
117 PPAR $\gamma$ <sup>23,24</sup>, or by the ability of TPhP to enhance the lipogenic activity of the thyroid hormone  
118 on isolated chicken embryo hepatocytes<sup>15</sup>. Of note, these doses clearly show a high toxicity for  
119 mammalian cells casting strong doubts on the relevance of these results for human physiology.  
120 In addition, cell-based transactivation assays somehow failed to confirm agonistic or  
121 antagonistic activities of TPhP on either PPAR or TR nuclear receptors<sup>25</sup>. Moreover, a treatment  
122 combining 4 APEs administered at individual doses of 1 mg/kg/day, a protocol likely to expose  
123 animals to a relevant dose of DPhP, decreases the body weight gain of these animals instead of  
124 increasing it. Similarly, recent reports indicated that exposure DPhP and TPhP could disrupt  
125 the metabolism in opposite manners<sup>22</sup>.

126 On these bases, we estimated that a large study mimicking optimal and relevant routes  
127 and doses of DPhP exposure in mouse models was critical. To validate our choice of using  
128 DPhP rather than TPhP or another APE in our toxicity study, we first analysed DPhP  
129 concentrations in blood of mice treated with various doses of both molecules via different routes  
130 of exposure. We hypothesised that humans are more likely to be continuously/chronically  
131 exposed to TPhP and DPhP owing to the presence of TPhP in air and dust, rather than  
132 temporarily/acutely exposed through nutrition. We thus decided to analyse how these two  
133 molecules were absorbed more continuously though drink water and kinetically transformed in  
134 mice, in comparison with other acute modes of administration such as oral gavage or tail-vein  
135 injection. We then presented the data reporting the bioaccumulation and distribution of these  
136 molecules in mice. Finally, since our aim was to analyse the biological consequences of a  
137 relevant DPhP exposure, we defined a workflow based on multi-omics analyses combining

138 metabolomics and transcriptomic analyses on tissue extracts obtained from independent  
139 experiments, followed by a histological validation. Results clearly demonstrate the ability of  
140 DPhP at a very low dose to disturb lipid metabolism processes in the liver, strongly questioning  
141 the safety of APEs.

## 142 **2. Results**

### 143 *Correlation analysis between TPhP/DPhP exposure and their level in blood and liver*

144 When 0.1 or 1 µg TPhP was injected directly into vein-tail or administered by oral gavage,  
145 DPhP was detected after one hour in a dose-dependent manner in whole blood (Figure 1A, B).  
146 Inversely, at these concentrations, TPhP could not be detected in the blood of exposed animals  
147 (data not shown). After administration of 10 µg or 100 µg TPhP, TPhP was only quantified in  
148 the blood of two animals at 2.33 ng/mL and 10.20 ng/mL, exposed to 100 µg following  
149 intravenous injection and oral gavage, respectively. In all other animals (18/20 animals), TPhP  
150 remained undetected. These results indicate that TPhP was either, rapidly transformed in the  
151 bloodstream or in the gut by the microbiota, or not absorbed by the digestive tract. To determine  
152 whether TPhP transformation into DPhP was the reason for the lack of detection of TPhP in the  
153 bloodstream, we also quantified DPhP in these same experiments. We detected small quantities  
154 of DPhP with the highest dose of TPhP administered (Figure 1A, B), but these were negligible  
155 compared to concentrations obtained after direct DPhP exposure, suggesting that detection of  
156 DPhP is not generally the consequence of the transformation of TPhP.

157 We further compared these results to a more continuous exposure to both molecules present in  
158 the drinking water of animals to mimic their chronic ingestion from swallowed dust. We used  
159 3 concentrations of 0.1 mg/L, 1 mg/L and 10 mg/L, equivalent to 0.5 µg, 5 µg and 50 µg of  
160 each molecule ingested overnight (active period for mice). These quantities were comparable  
161 to those used with other routes of exposure. At the two highest concentrations, DPhP was still

162 dose-dependently detectable in whole blood with lower concentrations measured than those  
163 obtained previously (Figure 1C). This was expected since the dose was now spread over a much  
164 longer period. Inversely, we did not detect any significant amount of TPhP in animals exposed  
165 to this same molecule through drinking water (data not shown). Most importantly, DPhP was  
166 not retrieved from the whole blood of animals exposed by this route to TPhP (Figure 1D).

167 Since the liver is the first organ to process exogenous molecules absorbed from the digestive  
168 tract, we further determined if these molecules were present in this organ using the same  
169 exposure doses via drinking water. DPhP was detected and quantified in a dose-dependent  
170 manner at all concentrations tested (Figure 1E), indicating that the molecule is efficiently  
171 absorbed in the liver before its eventual bio-transformation and clearance by the kidney. Again,  
172 neither TPhP nor DPhP were detected in the liver of animals exposed to TPhP through drinking  
173 water (Figure 1F), confirming that TPhP ingestion is not at the origin of the DPhP found in  
174 human urine.

#### 175 ***Bio-accumulation and distribution of DPhP in chronically exposed mice***

176 Based on these analyses, we next focused on the consequences of chronic exposure to DPhP.  
177 Mice were exposed daily to similar doses of DPhP in their drinking water, over a 12-week  
178 period. We analysed four tissues, namely the whole blood, the liver, the visceral fat and the  
179 mammary gland, potentially presenting a tropism for the molecule, either due to their chemical  
180 characteristics (presence of hydrophobic constituent for mammary gland and visceral fat) or to  
181 the route of exposure used for these experiments (whole blood and liver). In the blood, DPhP  
182 was again significantly detected in all animals chronically exposed to DPhP in drinking water  
183 at 1 mg/mL and 10 mg/mL. (Figure 2A). Values obtained after chronic treatment were  
184 significantly higher in comparison with our previous overnight exposure (Figure 1E and 2A).  
185 For instance, exposure to 1 mg/mL resulted in an increase (> 2-fold), indicating that a  
186 cumulative effect occurred during chronic exposure. DPhP was also detected in the liver at all

187 tested concentrations in a dose-dependent manner (Figure 2B). However, a cumulative effect  
188 was not observed here, suggesting that other tissues had likely absorbed the molecule and/or  
189 released it into the bloodstream. Consistently, DPhP was detected in both visceral fat and  
190 mammary gland, gradually increasing with treatment doses (Figure 2C, D).

### 191 *Biological effects of exposure to DPhP through metabolomics analyses of the liver*

192 Since DPhP was abundant in the liver of all treated animals, even at the lowest concentration  
193 of 0.1 mg/L given via drinking water, we focused our subsequent experiments on this organ in  
194 order to measure the possible biological consequences of these molecules. Through multiple  
195 injections (n = 8), we first verified that the metabolic profiles obtained by LC-HRMS could  
196 discriminate the 4 groups of samples (untreated (CTRL) or treated with 3 different doses of  
197 DPhP, 0.1 mg/L (C1), 1 mg/L (C2), 10 mg/L (C3)). Principal component analysis applied using  
198 the unit variance algorithm discriminated the samples, 68% of the variance being attributable  
199 to the first 3 axes of the PCA (Figure 3A). To determine which metabolites were involved in  
200 this discrimination, we used a volcano plot representation to compare each treated group to the  
201 control animals and annotated the most discriminating compounds as indicated in the Figures  
202 3B-D. At this stage, discriminating compounds were identified through their exact mass, their  
203 expected presence in mammalian organisms and, eventually their fragmentation spectrum (see  
204 methods and Figure S1). As expected, discriminating compounds were relatively  
205 heterogeneous, chemically and functionally, even though a subset of acylcarnitines were  
206 apparently significantly downregulated in exposed animals at all concentrations. From these  
207 first hits, we decided to perform an in-depth analysis combining 175 annotated metabolites  
208 either highly enriched or showing a very robust deviation from control conditions, to which we  
209 added the main intermediate metabolites (glycolysis, TCA cycle, amino-acids, fatty acids...)  
210 (Supplemental Table 1). Due to the heterogeneity of these metabolites and, for some of them,  
211 their non-appurtenance to the endogenous metabolism, we performed an initial comparison



212 based on their structural homology and chemical ontology. This type of analysis eliminates bias  
213 due to incomplete mapping and network size heterogeneity observed when using classical  
214 pathway enrichment<sup>26</sup>. A circular tree plot for each concentration is shown in Figure 4A. One  
215 of the clusters clearly highlighted acylcarnitines, an important amount of these metabolites  
216 showing a clear trend towards a lower concentration after exposure to DPhP. Interestingly,  
217 another pool of increasing metabolites appeared in a dose-dependent manner, revolving around  
218 the purine nucleotides and containing metabolites associated with the synthesis of nicotinamide  
219 dinucleotide. To extend these analyses, we then constructed an enrichment plot displaying the  
220 significance of the observed change for structural homologies, the size of the cluster and the  
221 homogeneity of their variation (Figure 4B and S2A, B). We confirmed a strong and significant  
222 decrease in acylcarnitines for all DPhP concentrations. In line with these results, an important  
223 number of fatty acids were altered, even though the direction of these alterations was not  
224 homogeneous. Moreover, we also noted an increase in purine-relative metabolites, even for the  
225 lowest DPhP concentration with a significant dose-dependent increase (cluster purine,  
226 purinone, nicotinic acid). Next, to determine how these different clusters were organised around  
227 endogenous metabolic networks, we combined chemical and biochemical mapping in a joint  
228 analysis using the MetaMapp algorithm<sup>27</sup> (Figure 4C and S2C, D). A clear connection was  
229 observed between the reduction of acylcarnitine pool and the decrease in a subset of fatty acids.  
230 Conversely, the increase in purine and dinucleotide metabolism was more scattered in the  
231 network mapping nucleic base, and tryptophan metabolism clusters. Moreover, we noted the  
232 existence of a metabolite pool containing endogenous and exogenous molecules with aromatic  
233 cycles known to be controlled by xenobiotic-activated responses. We then decided to perform  
234 a hierarchical clustering of our annotated metabolites associated with their detected level in  
235 each condition, the aim being to combine on the same graph the results obtained with the  
236 different concentrations of DPhP used. Interestingly, this analysis performed with only 175

237 metabolites clearly discriminated the 3 exposed conditions from the control, in a similar way to  
238 the PCA based on the entire dataset of detected mass (Figure 3A and 4D). Moreover, the  
239 metabolic profiles described in this analysis and associated with exposed animals strongly  
240 clustered together in comparison with the control, with the lowest concentration being the least  
241 distant. The intermediate and the highest concentrations gave the closest results, but a careful  
242 inspection of the obtained clusters confirmed the reduction of the acylcarnitine pool even with  
243 the lowest concentration of DPhP and without a clear dose-dependent type response (Figure  
244 4E). The most abundant fatty acids such as oleic acid and palmitic acids were also present in  
245 this cluster. Inversely, another cluster containing various types of molecules clearly displayed  
246 metabolite accumulation in a dose-dependent response (Figure 4F). Several xenobiotics were  
247 present in this cluster, as well as tryptophan and aromatic derivatives indicating that exposure  
248 to DPhP, itself a xenobiotic and an aromatic compound, was disturbing the metabolism  
249 associated with these molecules. Finally, we noted the presence in this cluster of dodecanedioic  
250 acid. The accumulation of this metabolite is associated with an impairment of fatty acid  
251 oxidation at the carnitine palmitoyl transferase (CPT) level<sup>28</sup>, an effect in line with the observed  
252 overall reduction of acylcarnitine pools.

253 Overall, these results indicate that fatty acid oxidation is disturbed upon exposure to DPhP,  
254 combining a lack of fatty acid substrate such as oleate, and a reduction of enzymatic activities  
255 required for acylcarnitine production from these substrates. Moreover, as shown above,  
256 increasing doses of DPhP apparently disturbed the xenobiotic response and the metabolic  
257 connections between the purine, the dinucleotide and the tryptophan metabolism. In order to  
258 validate these conclusions, we performed a last series of analyses to confirm the most important  
259 metabolites associated with this study. Retention time and fragmentation spectra of standards  
260 were obtained and compared to the values obtained from the samples. Supplemental Table 2

261 recapitulates the confirmed metabolites and their mean and median concentrations obtained  
262 with the different animals exposed.

### 263 *Biological effects of DPhP exposure through transcriptomic analyses of the liver*

264 The second part of our multi-omics analyses was then performed on another batch of 20 animals  
265 treated identically. mRNA were extracted from pooled liver and analysed by next-generation  
266 sequencing using 4 analytical replicates. Genes were then filtered and only those displaying a  
267 mean RPKM > 0.2 in the control condition were conserved (Supplemental Table 3). PCA was  
268 performed using the mean expression associated with the 4 experimental conditions. When the  
269 first axis was considered, the three treated conditions were significantly different from the  
270 control, the most discriminating treatment being associated with the intermediate concentration  
271 of DPhP (Figure 5A left panel). Interestingly, this pattern was correlated with the metabolic  
272 difference observed, since this concentration had the greatest effects. We noticed that 44% of  
273 the total variance was attributable to the first axis (Figure 5A right panel), suggesting that the  
274 genes with the highest Eigen values on this axis were the most relevant for the biological effects  
275 of DPhP. We consequently selected the most discriminating genes (Supplemental Table 4,  
276 Eigen value > 0.3) and performed a gene ontology analysis using the String software v11. For  
277 the analysis, genes were ranked according to their Eigen value for generating a functional  
278 enrichment score/false discovery rate, then used to construct a volcano plot (Figure 5B and  
279 Supplemental Table 5). The most significantly and highly depleted processes in the exposed  
280 versus control conditions, were those related to lipid metabolism and more specifically to fatty  
281 acid oxidation. However, we could also notice a significant inhibition of genetic response  
282 associated with xenobiotic metabolism. These results were thus indicative of the existence of  
283 an inhibition of these genetic programmes in exposed animals and of a relevant correlation with  
284 our previous experiments analysing the metabolome of animals treated identically. Moreover,  
285 when we retrieved the gene list associated with the fatty acid catabolic process, and selected

286 the most discriminating genes in our dataset (Eigen value  $> 0.3$ ), we confirmed that these genes  
287 encoded functional protein networks related to mitochondrial and peroxysomal fatty acid  
288 oxidation with a very high confidence rate (Figure 5C left panel). Since fatty acid oxidation is  
289 strongly regulated by the PPAR transcription factor, we verified that PPAR signalling was also  
290 among the significant terms associated with our ranked gene list (Figure 5C right panel). The  
291 network reconstructed from this last term demonstrated that PPAR $\alpha$  target genes were at the  
292 heart of the dysregulation process, strongly suggesting a specific alteration of this genetic  
293 response critical for the control of lipid catabolism in the liver.

294 Next, we verified for each treatment dose that the same trends were observed by comparing  
295 their RPKM values to those of the control. In this case, we directly used the calculated fold  
296 change of genes with an RPKM value  $> 0.2$ . Based on an identical approach combining a  
297 volcano plot and a protein network reconstruction for each analysis, we demonstrated that genes  
298 related to fatty acid oxidation and lipid catabolism were inhibited in treated animals,  
299 independently of the doses used (Figure S3A-C and S4A-C, Supplementary Table 6). Of note,  
300 significance and enrichment scores of the observed changes increased according to DPhP doses,  
301 whereas the density of the protein network encoded by genes altered and related to the lipid  
302 catabolism was the highest with the intermediate concentration (edge and node numbers, see  
303 methods).

304 Finally, to exclude a possible artefact arising from poor analytical replicates, we performed a  
305 PCA and an OPLS-DA analysis on the 16 analytical samples by comparing each treated group  
306 to control animals. Good separation between the replicates was obtained by using the 2<sup>nd</sup>, the  
307 4<sup>th</sup> and the 5<sup>th</sup> axis of the PCA (Figure 6A). For each principal component, we retrieved the  
308 Eigen values and performed a Gene ontology analysis with these scores (Supplemental Table  
309 7). Using the second axis in which C2 is the most distant from the control, this analysis  
310 confirmed the existence of a repression of genes controlling fatty acid catabolism in samples

311 arising from treated animals (Figure 6B). Interestingly, by analysing the two other components,  
312 we observed that the highest concentrations of DPhP also increased the expression of genes  
313 associated with the synthesis of sterol-derived metabolites, indicating a more complex  
314 alteration of lipid metabolism (Figure 6C). Finally, we noticed that the lowest DPhP  
315 concentration increased the expression of genes related to the tryptophan and the xenobiotic  
316 metabolism (Figure 6D). This was intriguing since tryptophan metabolites have been connected  
317 to aryl metabolism and the xenobiotic receptor AHR<sup>28,29</sup>, whereas our metabolomics approach  
318 revealed an accumulation of the same benzene derivatives in a dose-dependent manner. To  
319 improve sample clustering, we then tested by OPLS-DA all possible combinations able to  
320 discriminate our 4 groups of replicates, using the control replicates as negative controls. Four  
321 predictive components were determined (Supplemental Table 8), three of which were plotted  
322 as indicated in the Figure 6E and confirmed the reliable separation of the different groups of  
323 replicates. The predictive component 3, classifying the samples in a dose/response manner was  
324 then used to build a bipartite view of enrichment network associating the 2000 most relevant  
325 genes to this component and the KEGG function related to these genes (Supplemental Table 8).  
326 The network highlighted two interconnected clusters of genetic programmes repressed in a  
327 dose-dependent manner by DPhP, namely the fatty acid metabolism and the xenobiotic  
328 response. Inversely, one cluster was related to weakly activated functions belonging to the  
329 control of mRNA processes and the acute phase response. The fatty acid cluster associated  
330 highly significant programmes related to fatty acid oxidation, peroxysome and PPAR  
331 transcriptional response (Figure 6F). Moreover, fatty acid biosynthetic processes such as fatty  
332 acid elongation also contributed to this large cluster, these latter functions being inhibited by  
333 DPhP treatment. Similarly, the xenobiotic cluster associated several types of xenobiotic  
334 responses such as those related to the cytochrome P450, the glucuronidation through the  
335 aldarate metabolism, or glutathione metabolism. Lastly, although not present directly in these

336 clusters, we confirmed here that the genetic programme controlling the metabolism of  
337 tryptophan was repressed by increasing doses of DPhP and established a clear gene connection  
338 (Maob, Hadh, Aldh3a2...) between this response and the two repressed clusters previously  
339 mentioned. Of note, results obtained from this last analysis could appear as counterintuitive  
340 with regards to the observed activation of tryptophan and xenobiotic responses by the lowest  
341 dose of DPhP. Hence, DPhP apparently regulated both responses in a complex inverted U-shape  
342 manner with an opposite outcome according to the dose used.

### 343 *Chronic DPhP treatment disturbs protein expression of the liver and the overall physiology*

344 Since our multi-omics analysis clearly demonstrated some abnormalities in the processes  
345 related to lipid catabolism and PPAR signalling, we performed a series of  
346 immunohistochemical analyses revolving around key enzymes of liver physiology, involved in  
347 fatty acid catabolic processes and ketone body formation. In addition, we stained the lipid  
348 droplets using Perilipin 2 staining, a protein surrounding these vesicles and correlated with their  
349 abundance<sup>30</sup>. Furthermore, we analysed enzymes controlling the gluconeogenesis to verify that  
350 an overall unspecific dysregulation of liver metabolism did not appear following DPhP  
351 treatment (Figure 7A). Expression of Pck1 was thus not repressed by exposure to DPhP,  
352 indicating the absence of a global hepatic dysregulation. In some treated animals, Pck1  
353 expression even increased, a mechanism associated with fasting. Conversely, the most striking  
354 difference observed was related to the inhibition of protein expression of Hmgcs2, a kernel  
355 PPAR $\alpha$  target gene, even at the lowest dose of DPhP (Figure 7A). This reduction occurred more  
356 specifically in the peri-portal area, where Hmgcs is normally more strongly expressed and  
357 active (Figure 7B and S5A). At the highest dose, 100% of animals presented this physiological  
358 alteration. Interestingly, this lower expression of HMGCS2 was highly correlated with a  
359 reduction of the amount of lipid droplets in animals exposed to 10 mg.L<sup>-1</sup> of DPhP (Figure 7A-  
360 C and S5B). However, this was not the case for the lowest doses where the amount of Perilipin

361 2 staining increased upon exposure to DPhP, indicating that lower PPAR $\alpha$  and  $\beta$ -oxidative  
362 activities may spare some fatty acids from storage depletion in these conditions. PPAR $\alpha$   
363 staining was also uncorrelated with Hmgcs2 expression since exposed animals displayed a  
364 stronger nuclear and cytosolic expression (Figure 7A), indicating that an active repression of  
365 its transcriptional activity was likely taking place after DPhP treatment.

366 All of our results highlight the disturbance in lipid metabolism. More specifically, DPhP-treated  
367 animals presented signs of fasting, including free fatty acid content and lipid droplet reduction,  
368 and reduction of fatty acid biosynthesis and oxidation. We thus used our previous cohort to  
369 construct the growth curve of these animals according to their overall weight gain. No  
370 significant difference was observed at the lowest doses, but a trend for weight loss was clearly  
371 evident in a dose-dependent manner (Figure 7D). Moreover, weight gain was significantly  
372 lowered in animals treated with the highest dose of DPhP.

### 373 **3. Discussion**

374 Only few studies have been conducted to directly test the effect of DPhP, the most common  
375 APE derivative in human samples. Our results confirm that DPhP levels in biological fluids are  
376 unlikely to represent a surrogate of direct APE ingestion, and consequently, are rather a  
377 surrogate of their presence in the environment, due to their spontaneous degradation. Therefore,  
378 we believe that experimental procedures revolving around DPhP such as those presented in this  
379 study are likely more relevant for assessing APE toxicity.

380 Using this strategy, our results clearly demonstrate that DPhP, even at low doses, disturbs liver  
381 metabolism, especially the lipids used in this organ. We clearly observed a reduction of the  
382 main free fatty acids (C16.0, C18.0, C18.1) and even a stronger effect on the acylcarnitine pools  
383 associated with the degradation of these fatty acids. In line with these results, dodecanedioic  
384 acid, a metabolite associated with the impairment of mitochondrial  $\beta$ -oxidation of fatty acids<sup>33</sup>

385 was dose-dependently accumulated during DPhP exposure. Moreover, our results demonstrate  
386 that the genetic programmes associated with the oxidation of fatty acids were strongly  
387 repressed, even at the lowest DPhP exposure concentration. Finally, an impact on the liver fat  
388 content and body weight of the animals could be observed, especially at the highest dose of  
389 DPhP where fatty acids and sterol synthesis was apparently also disturbed in an inverted  
390 manner, at least at the transcriptional level. Taken together, these results strongly point towards  
391 a significant dysregulation of lipid homeostasis, likely involving PPAR $\alpha$  activity and possibly  
392 other members of this nuclear receptor family.

393 PPAR $\alpha$  is a key coordinator of fast-fed transition at the hepatic level with paradoxical effects<sup>34</sup>.  
394 PPAR $\alpha$  is thus the main activator of fatty acid oxidation and ketogenesis during adaptation to  
395 long-term fasting<sup>35</sup>, but also in normal conditions to circadian feeding<sup>36</sup>. Therefore, PPAR $\alpha$   
396 controls on the one hand *de novo* lipid synthesis and fatty acid uptake during feeding periods,  
397 supplying store droplets, and on the other hand it activates triglyceride and cholesteryl-ester  
398 lysis and oxidation of released lipids between meals. The simultaneous inhibition of fatty acid  
399 oxidation and reduction of the main fatty acid produced by *de novo* synthesis perfectly  
400 corresponds to a model of PPAR $\alpha$  inhibition upon exposure to DPhP, the lack of fatty acid  
401 likely contributing to the overall reduction of acylcarnitines. Our findings that lipid stores in  
402 the liver of animals exposed to low concentrations of DPhP are not depleted is also coherent  
403 with this model, since an equilibrium may be found between the lack of fatty acid storage and  
404 a lower use of these fatty acids. However this may have several consequences, for instance it  
405 has been shown that PPAR $\alpha$  inhibition is associated with a higher amount of plasma  
406 triglyceride and LDL<sup>37,38</sup>, both being strongly associated with the development of  
407 cardiovascular disease, dyslipidemia, metabolic syndrome and even cancer.



408 Importantly, this equilibrium is likely subtle and not easy to maintain, since we can clearly see  
409 a tendency towards weight reduction in exposed animals and a reduction in lipid stores in those  
410 ingesting the highest dose of DPhP. Several mechanisms could contribute to these secondary  
411 effects, taking place directly in the liver or involving a more complex interaction with other  
412 organs. First, despite reduction in fatty acid oxidation, this effect may not be sufficient to  
413 compensate for the lack of fatty acid uptake and production at some threshold of PPAR $\alpha$   
414 inhibition or after long-term exposure. Second, other members of the PPAR nuclear receptor  
415 family may be perturbed, since they are more directly involved in fat digestion, sterol synthesis  
416 and storage of fatty acids in the liver and the white adipose tissue<sup>34</sup>. PPAR $\alpha$  and  $\gamma$  are thus able  
417 to bind the same ligands with a same order of affinity potentially explaining that high doses of  
418 DPhP may simultaneously inhibit both types of receptors<sup>39</sup>. PPAR $\gamma$  inhibition in WAT could  
419 then be associated with the significant weight loss observed at the highest dose of DPhP. Our  
420 observations describing the inhibition of genetic programmes associated with fat digestion and  
421 sterol synthesis thus clearly argue in favor of this model.

422 Interestingly, our study highlights the regulation of xenobiotic and tryptophan metabolism.  
423 Indeed, we noticed the alteration of several metabolites, endogenous and exogenous, containing  
424 an aromatic ring and/or associated with the tryptophan metabolism. These compounds are  
425 implicated in the regulation of AHR, an important xenobiotic receptor<sup>40</sup>. Moreover, even  
426 though DPhP does not contain the classical polycyclic structure associated with known ligands  
427 of these receptors, it possesses two aromatic rings susceptible to stack with these structures and  
428 disturbing their interaction with AHR. Moreover at the genetic level, we also noticed that  
429 exposure to DPhP disturbs the xenobiotic response and tryptophan metabolism. We verified the  
430 level of AHR, and the expression of canonical target genes of this receptor but did not observe  
431 any obvious difference. However, this was expected as mice were not challenged with a  
432 classical AHR agonist, although it raises questions as to the possible interactions between DPhP

433 and a classical aromatic polycyclic hydrocarbon. Finally, recent studies suggest that AHR may  
434 be involve in fatty acid metabolism<sup>41</sup>, independently of its role as a xenobiotic regulator,  
435 potentially explaining part of the biological effects of DPhP.

436 In conclusion, our results raise many questions on the use, the safety and the presence in the  
437 environment of APEs, most of them being susceptible to expose humans to DPhP. We did not  
438 fully characterise the molecular mechanisms underlying the apparent alterations in lipid  
439 homeostasis and PPAR activities by these compounds, as this was beyond the scope of our  
440 study. However, the known function of these factors and their association with the metabolic  
441 syndromes should constitute a sufficiently strong risk factor to measure the health hazards  
442 associated with their presence in the environment more precisely, by taking into consideration  
443 the diet into future epidemiological studies. Moreover, the potential interaction of these  
444 compounds with known activators of AHR should be investigated with the aim of determining  
445 the possible existence of synergistic effects and to characterise the mechanisms, directly or  
446 indirectly, inhibiting PPAR activities.

## 447 **4. Methods**

### 448 *4.1. Reagents and chemicals*

449 Diphenyl phosphate, diphenyl phosphate-D<sub>10</sub> and triphenyl phosphate-D<sub>15</sub> were purchased  
450 from Merck (Darmstadt, Germany) with a purity higher than 98%. The confirmation standards  
451 of carnitine, acetylcarnitine, palmitoylcarnitine, lauroylcarnitine, decanoylcarnitine,  
452 hexanoylcarnitine, stearic acid, oleic acid and linoleic acid were obtained from Merck, all of  
453 them with a purity higher than 97%.

454 Acetonitrile and heptane of LC-MS quality grade and ammonium formate were supplied  
455 from by BioSolve (Dieuse, France). Water and formic acid quality grade optima LC-MS were  
456 purchased from Fisher Scientific (Illkirch, France).

457 An emulsion was created containing corn oil for DPhP and TPhP resuspension and animal  
458 exposure and 50% of corn oil from Merck (Darmstadt, Germany).

#### 459 *4.2. Biological samples from animals and animal care*

460 FVB mice (5 wk old) from Charles River Laboratories were used for all experiments. Animals  
461 were housed in the ANICAN (Centre de Recherche en Cancérologie de Lyon) animal facilities  
462 accredited by the French Ministry of Agriculture. Food and water were provided *ad libitum*  
463 (lights on: 08:00 to 20:00 hours; temperature: 22°C±1°C; humidity: 55%±10%). Experimental  
464 groups were designed as follows: a control group and six exposed groups at 0.1 mg/mL (C1), 1  
465 mg/mL (C2) and 10 mg/mL (C3) of DPhP or TPhP for acute exposure. Mice were only treated  
466 with DPhP for chronic exposure experiments. At least 5 animals were used in each group for  
467 acute exposure for each described series of experiments. For chronic exposure, 2 independent  
468 experiments were carried out with 10 animals per group. Metabolomic and transcriptomic  
469 analyses were performed on these separate and independent experiments reinforcing the  
470 strength of the correlations observed. Between groups, animals were randomized according to  
471 their weight at the time of reception. Animal experiments were performed in compliance with  
472 French and European regulations on protection of animals used for scientific purposes (EC  
473 Directive 2010/63/EU and French Decree 2013–118). They were approved by Ethics  
474 Committee and authorized by the French Ministry of Research (APAFIS#3680-  
475 2016010509529577v5).

#### 476 *4.3. Sample preparation for metabolomics*

477 A liquid solid extraction was developed for the targeted analysis of diphenyl phosphate and  
478 triphenyl phosphate. 20 mg of liver were weighed and 45 µL of internal standard solution at 2  
479 ppm of DPP-d10 and TPP-d15 were added. The mixture was homogenized with a vortex and  
480 evaporated. Three zirconium balls, 1 mL of acetonitrile and 0.5 mL of heptane were added. The

481 mixture was homogenized again during 2 min at 3,200 rpm and centrifuged at 10,000 rpm for  
482 7 min. The heptane was discarded, 750  $\mu$ L of acetonitrile were transferred to a vial and a second  
483 extraction with 1mL of acetonitrile was conducted using the same methodology. Finally, all the  
484 extracts (total of 1.5 mL of acetonitrile) were pooled, split into two portions of 750  $\mu$ L,  
485 evaporated at 35°C during approximately 90 min and stored at -20°C. The samples were  
486 reconstituted with 75  $\mu$ L of water/acetonitrile 90:10 (v/v), prior LC-HRMS analysis reverse  
487 phase chromatography, or with 75  $\mu$ L of acetonitrile/water 95:5 (v/v). The extraction was  
488 conducted from eight samples of each administered concentration to obtain a suitable, reliable  
489 and reproducible statistical results.

#### 490 *4.4. UHPLC-ESI-MS/MS analysis*

491 Separation was carried out using an Ultimate 3000 UHPLC system (Thermo Scientific®,  
492 MA, USA). The chosen column was a Luna Omega polar C<sub>18</sub> (100x2.1 mm, 1.6  $\mu$ m particle  
493 size) (Phenomenex, Torrance, CA, USA), since it has more affinity for polar compounds, to  
494 expand the number of detected compounds and detected a larger number of metabolites  
495 (normally more polar than parent compounds). A nucleodur HILIC column (100x2.1 mm, 3  $\mu$ m  
496 particle size) (Macherey Nagel, Hoerdt, France) was also used to confirm the identified  
497 compounds or detected other compounds that the C<sub>18</sub> column did not highlight due to their  
498 different polar affinities. The columns were maintained at 30°C during the analysis.

499 With the C<sub>18</sub> column the mobile phase was water/acetonitrile 90/10 (v/v) 5 mM ammonium  
500 formate and 0.01% formic acid (A) and acetonitrile 5 mM ammonium formate and 0.01%  
501 formic acid (B). The gradient elution has a flow of 0.3 mL/min and it started at 100% of A and  
502 held during 1 min. The percentage of A then decreased until reaching 0% in 10 min. The  
503 gradient was held at this percentage for 4 min prior to finally returning to 100% of A and held  
504 for 3 min to condition the column for the next injection. The total running time was 18 min.  
505 The injection volume was 5  $\mu$ L.

506 For the HILIC column, the mobile phase was water 5 mM ammonium formate and 0.01%  
507 formic acid (A) and acetonitrile:water 95/5 (v/v) 5 mM ammonium formate and 0.01% formic  
508 acid (B). The elution gradient had a flow rate of 0.4 mL/min and started with 95% of B and was  
509 held for 2 min. It was then decreased to 70% in 7 min and 50 % in another 2 min. The percentage  
510 was held for 4 min to return to the initial percentage in 0.1 min and equilibrated during 10 min.  
511 The total running time was 25 min. The injection volume was 5  $\mu$ L.

512 The chromatographic system was coupled to a QToF mass spectrometer (Maxis Plus, Bruker  
513 Daltonics®, Bremen, Germany) with electrospray ionization interface (ESI) operating in  
514 positive and negative mode. The following settings were used: capillary voltage of 3600 V, end  
515 plate offset of 500 V, nebulizer pressure of 3 bar (N<sub>2</sub>), drying gas of 9 L/min (N<sub>2</sub>), and drying  
516 temperature of 200°C. A solution of sodium formate and acetate (10 mM) clusters was used for  
517 external calibration at the beginning of each run. The analysis was performed in a full scan over  
518 the mass range of 50-1,000 Da with a scan rate of 1 Hz. Moreover, the analysis was carried out  
519 in profile mode with the following transfer parameters: funnel 1 RF of 200 Vpp, multipole RF  
520 of 50 Vpp, quadrupole energy of 5 eV, collision energy of 7 eV, stepping basic and a pre-pulse  
521 storage of 5 ms. The instrument resolution was estimated at 21244 (FWHM) at  $m/z = 415.211$ .

522 The MS/MS experiments were done in data-dependent acquisition mode (AutoMSMS) with  
523 a cycle time of 3s and a spectra rate between 2Hz and 16Hz in order to record low and high  
524 intensity precursors. They were just conducted on quality control (QC) sample to get MS/MS  
525 spectra. Quality controls made by mixing 5  $\mu$ L of each sample were injected every 13 samples,  
526 with a percentage sample/QC approximately of 10%. The samples were analysed randomly to  
527 ensure the representativeness of the results.

528 The software used to acquire data and instrument control were OTOF control 4.1, Hystar 4.1  
529 (Bruker Daltonics®), Data Analysis® 4.4, Metaboscape 4.0 (Bruker Daltonics®) and Mass  
530 Frontier™ 7.0 (Thermo Scientific®) were used for data processing.

#### 531 4.5. Annotation workflow

532 The data obtained from the analysis of the samples were processed using MetaboScape 4.0,  
533 including in this analysis all the studied concentrations. The principal parameters used to create  
534 the bucket table were: Intensity threshold=5000 counts; minimum peak length=7 spectra;  
535 perform MS/MS import, group by collision energy; retention time window (min) =0.4-15; mass  
536 window ( $m/z$ ) =60-1000; EIC=0.8; Ions= $H^+$ ,  $Na^+$ ,  $K^+$ ,  $NH_4^+$ ,  $-H_2O+H^+$ . The bucket table (1720  
537 couples or features) contained information regarding retention time, ion  $m/z$  ratio, neutral mass,  
538 detected ions, MS/MS spectrum and relative peak intensity of features in each sample.

539 The bucket tables were analysed by unsupervised principal components analysis (PCA)  
540 conducted simultaneously on all samples (C1, C2, C3 and control), using the pareto algorithm  
541 as an observatory method to discriminate groups of samples. Supervised partial least squares  
542 (PLS) (using pareto algorithm) and T-Test (using group mean algorithm), individually  
543 comparing each contamination concentration and control were conducted. A  $p$ -value < 0.05  
544 was considered to be significantly differentially expressed.

545 For compound annotations, the formulas of the couples with a  $p$ -value < 0.05 were selected  
546 based on a mass deviation under 5 mDa and 2 ppm. mSigma (comparison between theoretical  
547 and experimental isotopic pattern) less than 20, was also taken into consideration when  
548 searching for compounds. The discovered formulas were from different databases (analyte DB,  
549 ChEBI, ChemSpider, PubChem, HMDB) and the compounds with a logical biological link with  
550 the matrix (compounds naturally present in liver or biological tissues) or previously detected in  
551 biological samples according to the literature were annotated for posterior evaluation. This  
552 process was done using the tool compound crawler, included in MetaboScape 4.0. Known  
553 intermediate metabolites were also investigated manually to complete the network according to  
554 a mass deviation less than 50 mDa and 20 ppm. Absence of significant  $p$ -value between  
555 conditions was not considered in this setting.

#### 556 4.6. Putative identification of metabolites

557 Some of the annotated masses had MS/MS spectra. The theoretical formulas for these masses  
558 were *in silico* fragmented using MetFrag (MetaboScape) and Mass Frontier. The compounds  
559 with a correlation of fragments higher than a 90% were annotated as putatively identified. The  
560 HILIC column was then used to compare the retention time obtained with both columns and to  
561 search new discriminant compounds through supervised multivariate statistical analysis (PLS  
562 and T-Test). Finally, in order to confirm these results, the analytical standards of some of  
563 putative compounds with a logical retention time in both columns were purchased. The spiked  
564 samples were those with the detected compounds had MS/MS spectra or with the highest  
565 concentration in the detected compounds. Besides, both were analysed, spiked and non-spiked  
566 samples to see the intensity differences between them in case retention times were the same.  
567 Comparison of MSMS spectra of spiked and non-spiked samples was performed to confirm the  
568 compounds.

#### 569 4.7 Chemrich and MetaMapp annotation

570 KEGG ID, Pubchem ID, SMILE and InchiKeys of annotated metabolites were retrieved from  
571 public databases as indicated in the former publication of these statistical tools. P-value and  
572 fold enrichment were obtained from the signal intensities associated with the multiple injections  
573 of each group of samples. Chemrich analyses were then obtained directly from the Chemrich  
574 interface website, whereas MetaMapp results were loaded in the cytoscape software to represent  
575 the network with an organic layout. Cluster name were retrieved in an unbiased way from  
576 Chemrich results tables. All tables associated with these analyses are available in the  
577 supplemental information section.

#### 578 4.8. Sample preparation for transcriptomic analyses and Next-Generation Sequencing

579 RNA extraction for tissue

580 Total RNA was extracted and purified using the RNeasy Mini Kit (Qiagen # 74106) from mouse  
581 liver. Furthermore, the RNeasy procedure enriches RNA species > 200 nt and excludes 5S  
582 rRNA, tRNAs, or other low molecular weight RNAs. RNA was isolated on the silica membrane  
583 in trusted RNeasy spin columns, with binding capacities of 100 µg of RNA, according to the  
584 supplier's recommendations (Qiagen).

585 RNAseq library sequencing and analysis

586 For the preparation of the NGS RNA library, RNA concentration was measured using the GE  
587 NanoView Spectrophotometer (Biochrom US, Holliston, MA, US). The quality of RNA  
588 samples was analyzed using the RNA 6000 Pico Kit running on the 2100 BioAnalyzer (Agilent  
589 Santa Clara, California, US). Total RNA was diluted in a final volume of 50 µL for a total input  
590 of 1 µg. Only the RNA pools with a RIN score higher than 7 were used in the NGS library  
591 preparation prior to sequencing.

592 Firstly, mRNAs were isolated using the NEBNext Poly(A) mRNA Magnetic Isolation Module  
593 from 1 µg of total RNA, in triplicate for each condition. The isolation procedure is based on the  
594 selection of mRNA using oligo dT beads directed against polyA tails of intact mRNA. Secondly,  
595 the NGS libraries were created from mRNA isolated using the NEBNext Ultra II Directional  
596 RNA Library Prep Kit for Illumina (NewEngland BioLabs, Ipswich, Massachusetts). Final  
597 libraries were sequenced on a Illumina NextSeq 500 on a high output flowcell with 2x75 bp  
598 paired-end read lengths.

599 The sequencing reads were obtained after demultiplexing the raw sequencing data using  
600 bcl2fastq v2.19.1.403 (Version v2.15.0 for NextSeq™ 500 and HiSeq® X Systems, Illumina),  
601 after having validated the quality controls of each sample using the FastQC v0.11.5 software  
602 (<https://www.bioinformatics.babraham.ac.uk/projects/fastqc/>). The alignment files were  
603 generated with STAR v2.5.2b (University of Birmingham) in the 2-pass mode. We used the



604 GRCm38, version M16 (Ensembl 91) as reference. This mode is known to improve the  
605 detection of more reads mapping novel splice junctions.

#### 606 *4.9. Gene ontology and statistical analyses of NGS*

607 Genes were filtered through their obtained RPKM. Only genes sufficiently expressed in control  
608 conditions were conserved for further analyses (RPKM > 0.2). PCA and Orthogonal Projections  
609 to Latent Structures Discriminant Analysis were performed on the R platform, using ROPLS  
610 package and 3D plots for visualization of the results. Gene ontology analyses were performed  
611 by using the Eigen values associated with the most significant axis used to construct PCA and  
612 OPLS-DA. With these methods, all conditions, the three different DPhP concentrations and the  
613 vehicle, were thus taken into consideration and simultaneously compared. Threshold for  
614 retained Eigen values used to select genes used in these analyses are indicated directly in the  
615 figures. Functional Enrichment Analysis (© STRING Consortium 2019) was then performed  
616 by sorting the selected genes according to their Eigen values. A volcano plot (R package  
617 EnhanceVolcano Plot) was eventually used to represent the discriminating functions for the  
618 studied axis through the enrichment score and the false discovery rate generated by the STRING  
619 algorithm. Only significant functions were retrieved.

620 Alternatively, paired analyses were performed using each concentration of DPhP against the  
621 vehicle. In this case, retained genes were selected through the fold change between both  
622 conditions. Gene ontology analysis was then performed identically with Functional Enrichment  
623 Analysis (© STRING Consortium 2019).

624 Finally, in a complementary approach, density of the protein networks associated with  
625 discriminating functions and encoded by the genes selected with these different approaches  
626 were measured through protein-protein association networks (© STRING Consortium 2019).  
627 High number of nodes and edges indicate that large functional complexes are disturbed through

628 multiple genetic regulations induced by DPhP exposure, reinforcing the probability of that  
629 function being disturbed by this condition. We used high-confidence settings to retain the  
630 experimentally validated interactions. A protein-protein interaction enrichment p-value was  
631 calculated against an identical number of random proteins.

#### 632 *4.10. Bipartite view of enrichment network*

633 NetworkAnalysis server (Mc Gill University) was used through the List Enrichment function.  
634 Functions belonging to the KEGG database were used and only those with a p.value < 0.03  
635 were conserved. Metabolic pathways and carbon metabolism functions were removed due to  
636 their very high coverage of the genome. The bipartite view was then selected and an auto-layout  
637 was applied. Clustering between functions was then enhanced through the Force Atlas tool.  
638 Clusters were then manually highlighted and default encoding of the functions through their p-  
639 value was converted into a continuous green-red scale.

#### 640 *4.11. Immunohistochemistry analyses*

641 For histological examination, tissue samples were fixed in 10% buffered formalin and  
642 embedded in paraffin. 4- $\mu$ m-thick tissue sections of formalin-fixed, paraffin-embedded tissue  
643 were prepared according to conventional procedures. Sections were then stained with  
644 haematoxylin and eosin and examined under a light microscope.

645 Immunohistochemistry was performed on an automated immunostainer (Ventana Discovery  
646 XT, Roche, Meylan, France) using Omnimap DAB Kit according to the manufacturer's  
647 instructions. Sections were incubated with the following antibodies: Anti-Perilipin2  
648 (AtlasAntibodies-HPA016607), Anti-Hmgcs2 (Santa Cruz-sc-376092), Anti-PPARalpha  
649 (Abnova-MAB12349), Anti-Pck1 (AtlasAntibodies-HPA006507), Anti-FBP1 (Abcam-  
650 ab109020) (all diluted at 1:100). An anti-rabbit/mouse - HRP was applied on sections. Staining  
651 was visualized with DAB solution with 3,3-diaminobenzidine as a chromogenic substrate.

652 Sections were counterstained with Gill's haematoxylin and finally scanned with panoramic scan  
653 II (3D Histech, Budapest, Hungary) at 20X. Scoring was performed by three independent  
654 investigators using a staining scale ranging from 0 to 10. The means were then calculated and  
655 encoded as follows. 0-2=no staining to very low staining (-), 2-4=low staining (+), 4-  
656 7=intermediate staining (++), 7-10=high staining (+++).

657

## 658 **ACKNOWLEDGMENTS**

659 The authors would like to thank N. Gadot for IHC analyses, I. Puisieux for its support to design  
660 animal experiments and B. Manship for critical reading of the manuscript. This study was  
661 strongly financed by the Plan Cancer et Environnement 2015-2019 (project PLASTOC-Plastic  
662 additives: study Of the potential risk for Cancer development through the evaluation of  
663 pharmacodynamics, accumulation and mechanisms in endocrine tissues). Our team is also  
664 certified by the Ligue nationale contre le cancer. Additionally, this work was supported by the  
665 Ligue contre le cancer (Comité du Rhône), the Association pour la Recherche contre le Cancer  
666 (project n° SFI20121205395,PJA20141201758, PJA 20171206303), and the Bonus Qualité  
667 Recherche (BQR) Accueil of Lyon University.

668

## 669 **AUTHOR CONTRIBUTIONS**

670 SR, MA and JD performed experiments on cell lines and animal models. SR coordinated  
671 animal experimentation and IHC analysis. JG, CB and LPG performed NGS and their  
672 bioinformatics analysis. AMV performed statistical retreatment of the data. JMS, AF, AB and  
673 EV designed and supervised metabolomics analyses and raw data retreatment. JMS and AMV  
674 performed then their statistical interpretation. LS and BG performed supervised quantification  
675 of APEs. EV supervised these analyses. BF, SI and TG helped to interpret the data. LPG and

676 AMV conceived the project, designed experiments, interpreted data, and wrote the manuscript.

677 All authors read and approved the final version of the manuscript.

678

## 679 **COMPETING FINANCIAL INTERESTS**

680 The authors declare having no competing interests

## 681 **5. References**

- 682 1. Ballesteros-Gomez, A. et al. In vitro metabolism of 2-ethylhexyldiphenyl phosphate (EHDPHP) by  
683 human liver microsomes. *Toxicol Lett* **232**, 203-12 (2015).
- 684 2. Ballesteros-Gomez, A., Van den Eede, N. & Covaci, A. In vitro human metabolism of the flame  
685 retardant resorcinol bis(diphenylphosphate) (RDP). *Environ Sci Technol* **49**, 3897-904 (2015).
- 686 3. Heitkamp, M.A., Freeman, J.P., McMillan, D.C. & Cerniglia, C.E. Fungal metabolism of tert-  
687 butylphenyl diphenyl phosphate. *Appl Environ Microbiol* **50**, 265-73 (1985).
- 688 4. Bjornsdotter, M.K. et al. Presence of diphenyl phosphate and aryl-phosphate flame retardants in indoor  
689 dust from different microenvironments in Spain and the Netherlands and estimation of human exposure.  
690 *Environ Int* **112**, 59-67 (2018).
- 691 5. Fu, L. et al. Organophosphate Triesters and Diester Degradation Products in Municipal Sludge from  
692 Wastewater Treatment Plants in China: Spatial Patterns and Ecological Implications. *Environ Sci*  
693 *Technol* **51**, 13614-13623 (2017).
- 694 6. Li, J. et al. A review on organophosphate Ester (OPE) flame retardants and plasticizers in foodstuffs:  
695 Levels, distribution, human dietary exposure, and future directions. *Environ Int* **127**, 35-51 (2019).
- 696 7. Wang, Y. & Kannan, K. Concentrations and Dietary Exposure to Organophosphate Esters in Foodstuffs  
697 from Albany, New York, United States. *J Agric Food Chem* **66**, 13525-13532 (2018).
- 698 8. Wang, Y., Kannan, P., Halden, R.U. & Kannan, K. A nationwide survey of 31 organophosphate esters  
699 in sewage sludge from the United States. *Sci Total Environ* **655**, 446-453 (2019).
- 700 9. Su, G., Letcher, R.J. & Yu, H. Organophosphate Flame Retardants and Plasticizers in Aqueous  
701 Solution: pH-Dependent Hydrolysis, Kinetics, and Pathways. *Environ Sci Technol* **50**, 8103-11 (2016).
- 702 10. Mitchell, C.A. et al. Diphenyl Phosphate-Induced Toxicity During Embryonic Development. *Environ*  
703 *Sci Technol* **53**, 3908-3916 (2019).
- 704 11. Jamarani, R., Erythropel, H.C., Nicell, J.A., Leask, R.L. & Maric, M. How Green is Your Plasticizer?  
705 *Polymers (Basel)* **10**(2018).
- 706 12. Meeker, J.D., Cooper, E.M., Stapleton, H.M. & Hauser, R. Urinary metabolites of organophosphate  
707 flame retardants: temporal variability and correlations with house dust concentrations. *Environ Health*  
708 *Perspect* **121**, 580-5 (2013).
- 709 13. Meeker, J.D. & Stapleton, H.M. House dust concentrations of organophosphate flame retardants in  
710 relation to hormone levels and semen quality parameters. *Environ Health Perspect* **118**, 318-23 (2010).
- 711 14. Sasaki, K., Suzuki, T., Takeda, M. & Uchiyama, M. Metabolism of phosphoric acid triesters by rat liver  
712 homogenate. *Bull Environ Contam Toxicol* **33**, 281-8 (1984).
- 713 15. Su, G., Crump, D., Letcher, R.J. & Kennedy, S.W. Rapid in vitro metabolism of the flame retardant  
714 triphenyl phosphate and effects on cytotoxicity and mRNA expression in chicken embryonic  
715 hepatocytes. *Environ Sci Technol* **48**, 13511-9 (2014).
- 716 16. Zhao, F., Kang, Q., Zhang, X., Liu, J. & Hu, J. Urinary biomarkers for assessment of human exposure  
717 to monomeric aryl phosphate flame retardants. *Environ Int* **124**, 259-264 (2019).
- 718 17. Van den Eede, N., Ballesteros-Gomez, A., Neels, H. & Covaci, A. Does Biotransformation of Aryl  
719 Phosphate Flame Retardants in Blood Cast a New Perspective on Their Debated Biomarkers? *Environ*  
720 *Sci Technol* **50**, 12439-12445 (2016).
- 721 18. Hou, R. et al. Enhanced degradation of triphenyl phosphate (TPHP) in bioelectrochemical systems:  
722 Kinetics, pathway and degradation mechanisms. *Environ Pollut* **254**, 113040 (2019).

- 723 19. Abdallah, M.A., Nguyen, K.H., Moehring, T. & Harrad, S. First insight into human extrahepatic  
724 metabolism of flame retardants: Biotransformation of EH-TBB and Firemaster-550 components by  
725 human skin subcellular fractions. *Chemosphere* **227**, 1-8 (2019).
- 726 20. Mendelsohn, E. et al. Nail polish as a source of exposure to triphenyl phosphate. *Environ Int* **86**, 45-51  
727 (2016).
- 728 21. Chen, G., Jin, Y., Wu, Y., Liu, L. & Fu, Z. Exposure of male mice to two kinds of organophosphate  
729 flame retardants (OPFRs) induced oxidative stress and endocrine disruption. *Environ Toxicol*  
730 *Pharmacol* **40**, 310-8 (2015).
- 731 22. Wang, D. et al. Neonatal triphenyl phosphate and its metabolite diphenyl phosphate exposure induce  
732 sex- and dose-dependent metabolic disruptions in adult mice. *Environ Pollut* **237**, 10-17 (2018).
- 733 23. Belcher, S.M., Cookman, C.J., Patisaul, H.B. & Stapleton, H.M. In vitro assessment of human nuclear  
734 hormone receptor activity and cytotoxicity of the flame retardant mixture FM 550 and its  
735 triarylphosphate and brominated components. *Toxicol Lett* **228**, 93-102 (2014).
- 736 24. Tung, E.W.Y., Ahmed, S., Peshdary, V. & Atlas, E. Firemaster(R) 550 and its components  
737 isopropylated triphenyl phosphate and triphenyl phosphate enhance adipogenesis and transcriptional  
738 activity of peroxisome proliferator activated receptor (Ppargamma) on the adipocyte protein 2 (aP2)  
739 promoter. *PLoS One* **12**, e0175855 (2017).
- 740 25. Kojima, H. et al. In vitro endocrine disruption potential of organophosphate flame retardants via human  
741 nuclear receptors. *Toxicology* **314**, 76-83 (2013).
- 742 26. Barupal, D.K. & Fiehn, O. Chemical Similarity Enrichment Analysis (ChemRICH) as alternative to  
743 biochemical pathway mapping for metabolomic datasets. *Sci Rep* **7**, 14567 (2017).
- 744 27. Barupal, D.K. et al. MetaMapp: mapping and visualizing metabolomic data by integrating information  
745 from biochemical pathways and chemical and mass spectral similarity. *BMC Bioinformatics* **13**, 99  
746 (2012).
- 747 28. Venkateswaran, N. et al. MYC promotes tryptophan uptake and metabolism by the kynurenine pathway  
748 in colon cancer. *Genes Dev* **33**, 1236-1251 (2019).
- 749 29. Yamamoto, T. et al. Kynurenine signaling through the aryl hydrocarbon receptor maintains the  
750 undifferentiated state of human embryonic stem cells. *Sci Signal* **12**(2019).
- 751 30. Straub, B.K. et al. Adipophilin/perilipin-2 as a lipid droplet-specific marker for metabolically active  
752 cells and diseases associated with metabolic dysregulation. *Histopathology* **62**, 617-31 (2013).
- 753 31. Su, G., Letcher, R.J., Yu, H., Gooden, D.M. & Stapleton, H.M. Determination of glucuronide  
754 conjugates of hydroxyl triphenyl phosphate (OH-TPHP) metabolites in human urine and its use as a  
755 biomarker of TPHP exposure. *Chemosphere* **149**, 314-9 (2016).
- 756 32. Roman, P., Cardona, D., Sempere, L. & Carvajal, F. Microbiota and organophosphates.  
757 *Neurotoxicology* **75**, 200-208 (2019).
- 758 33. Korman, S.H., Waterham, H.R., Gutman, A., Jakobs, C. & Wanders, R.J. Novel metabolic and  
759 molecular findings in hepatic carnitine palmitoyltransferase I deficiency. *Mol Genet Metab* **86**, 337-43  
760 (2005).
- 761 34. Dubois, V., Eeckhoutte, J., Lefebvre, P. & Staels, B. Distinct but complementary contributions of PPAR  
762 isotypes to energy homeostasis. *J Clin Invest* **127**, 1202-1214 (2017).
- 763 35. Janssen, A.W. et al. The impact of PPARalpha activation on whole genome gene expression in human  
764 precision cut liver slices. *BMC Genomics* **16**, 760 (2015).
- 765 36. Gachon, F. et al. Proline- and acidic amino acid-rich basic leucine zipper proteins modulate peroxisome  
766 proliferator-activated receptor alpha (PPARalpha) activity. *Proc Natl Acad Sci U S A* **108**, 4794-9  
767 (2011).
- 768 37. Schoonjans, K. et al. PPARalpha and PPARgamma activators direct a distinct tissue-specific  
769 transcriptional response via a PPRE in the lipoprotein lipase gene. *EMBO J* **15**, 5336-48 (1996).
- 770 38. Watts, G.F. et al. Differential regulation of lipoprotein kinetics by atorvastatin and fenofibrate in  
771 subjects with the metabolic syndrome. *Diabetes* **52**, 803-11 (2003).
- 772 39. Lim, H. & Dey, S.K. A novel pathway of prostacyclin signaling-hanging out with nuclear receptors.  
773 *Endocrinology* **143**, 3207-10 (2002).
- 774 40. Bock, K.W. Aryl hydrocarbon receptor (AHR): From selected human target genes and crosstalk with  
775 transcription factors to multiple AHR functions. *Biochem Pharmacol* **168**, 65-70 (2019).
- 776 41. Bock, K.W. Aryl hydrocarbon receptor (AHR) functions in NAD(+) metabolism, myelopoiesis and  
777 obesity. *Biochem Pharmacol* **163**, 128-132 (2019).

778

779

780 **FIGURE LEGENDS**

781 **Figure 1.** Acute exposure to DPhP and TPhP

782 A-D. 5 animals were exposed to the indicated doses of DPhP or TPhP via two routes of  
783 administration. After 1 h, DPhP was quantified from the whole blood. Concentrations obtained  
784 are plotted on the box and whisker plot indicating significant p-value calculated between tested  
785 conditions and the vehicle.

786 E-F. Identical experiment with DPhP quantification performed on liver extracts.

787

788 **Figure 2.** Chronic exposure to DPhP

789 A-D. 5 animals were chronically exposed to the indicated concentrations of DPhP for 12 weeks  
790 through drinking water. DPhP was then quantified in the indicated biological matrix.  
791 Concentrations obtained are plotted on the box and whisker plot indicating significant p-values  
792 calculated between tested conditions and the vehicle.

793

794 **Figure 3.** Hepatic metabolomics analysis of animals exposed to DPhP

795 A. Principal Component Analysis was performed using pareto algorithm as an observatory  
796 method to discriminate groups of samples based on the amount of retained ion m/z (see  
797 methods). Explained variance with the 3 first axes is indicated.

798 B-D. A volcano plot was created through supervised partial least squares (PLS) (using pareto  
799 algorithm) and T-Test (using group mean algorithm), individually comparing the metabolite  
800 concentrations for each dose of DPhP used against control values. Most significant metabolites  
801 were annotated when possible and indicated directly on the plot.

802 **Figure 4.** Metabolic network analysis through structural identity and pathway mapping

803 A. Data associated with 175 metabolites either significantly altered or belonging to the main  
804 intermediate metabolites were used to perform a Chemical Similarity Enrichment Analysis  
805 (ChemRICH). A Tanimoto chemical similarity mapping form a clustered circular similarity  
806 tree. Dark black lines indicate boundaries of clusters that are significantly different in exposed  
807 animals at the indicated concentration of DPhP versus control mice ( $p < 0.05$ ). Increased  
808 metabolite levels in exposed mice are labelled as red nodes, decreased levels are marked in  
809 blue. Cluster label is indicated.

810 B. ChemRICH set enrichment statistics plot for the same metabolites as A, extracted from  
811 exposed animals with the C2 concentration of DPhP versus control. Each node reflects a  
812 significantly altered cluster of metabolites. Enrichment p-values are given by the Kolmogorov–  
813 Smirnov-test. Node sizes represent the total number of metabolites in each set of clusters. The  
814 node colour scale shows the proportion of increased (red) or decreased (blue) compounds in  
815 exposed mice compared to control mice. Purple-colour nodes have both increased and  
816 decreased metabolites.

817 C. MetaMapp visualization of the same metabolomics data highlighting the differential  
818 metabolic regulation and the organization of metabolic clusters based on KEGG reactant pair  
819 information and Tanimoto chemical similarity matrix. Increased metabolite levels in exposed  
820 mice are labelled as red nodes, decreased levels are marked in blue. Intensity differences are  
821 also encoded in node size. Cluster label is indicated. Metabolites previously clustered together  
822 based on their structural similarity could now be separated according to their different pathway  
823 mapping (dinucleotides are now present in the tryptophan metabolism cluster, whereas purine  
824 are in the nuclei base metabolism.)

825 D-F. Identical data obtained for the same 175 metabolites and the same 4 groups of exposed  
826 and control animals were clustered hierarchically through their relative level (complete linkage  
827 with spearman correlation). Yellow-blue encoding is used to represent these metabolites  
828 according to their absolute amounts. Distance between levels of samples and metabolites are  
829 shown as two tree plots. Clusters containing the acylcarnitines or the dodecanedioic acids are  
830 highlighted and enlarged in the indicated right-hand panels.

831

832 **Figure 5.** Transcriptomic analysis of liver belonging to animals exposed to DPhP

833 A. Principal Component Analysis was performed using pareto algorithm as an observatory  
834 method to discriminate group of sample replicates based on the amount of mRNA expression  
835 obtained from indicated animals, through reverse transcription and Next-Generation-  
836 Sequencing. Considered genes and explained variance with the 2 first axes of the PCA are  
837 indicated.

838 B. Gene ontology analysis of the most discriminant genes (Eigen value  $> 0.3$ ) used to build the  
839 first axis of the previous PCA performed through Functional Enrichment Analysis (© STRING  
840 Consortium 2019). Results are presented as a volcano plot of the significant discriminating  
841 functions associated with this principal component. Term related to Lipid oxidation (red), Lipid  
842 metabolic processes (blue) and xenobiotics metabolism (yellow) are highlighted as indicated.  
843 The highest significant functions belonging to these terms are listed on the right panel.

844 C. Identical genes with a significant Eigen value ( $> 0.3$ ) and overlapping the indicated GO term  
845 were used to build a protein-protein interaction network (© STRING Consortium 2019) with a  
846 high level of confidence setting. Genes belonging to a particular organelle network are  
847 highlighted in blue (Mitochondria) and red (Peroxisome). Numbers of edges and nodes are  
848 indicated as well as PPI enrichment (see methods)



849 D. Identical genes with a significant Eigen value ( $> 0.3$ ) and overlapping the indicated GO term  
850 were used to build a protein-protein interaction network (© STRING Consortium 2019) with a  
851 high level of confidence. Genes belonging to a particular network of organelles are highlighted  
852 in blue (PPAR $\alpha$  specific target genes), green (PPAR $\gamma$  specific target genes) and red (any PPAR  
853 target gene). Number of edges and node numbers are indicated as well as PPI enrichment (see  
854 methods)

855

856 **Figure 6.** Transcriptomic functions significantly associated with each group of exposed animals

857 A. Principal Component Analysis was performed using pareto algorithm as an observatory  
858 method to discriminate individual sample replicates based on the amount of mRNA expression  
859 obtained from indicated animals, through reverse transcription and Next-Generation-  
860 Sequencing. Individual replicates could be grouped efficiently through the indicated PCA axis.

861 B-D. Gene ontology analysis of the most discriminating genes (Eigen value  $> 0.3$ ) used to build  
862 the indicated axis of the previous PCA performed with STRING. Results are presented as a  
863 volcano plot of the significant discriminating function for the indicated axis. Note that axis 2,  
864 axis 4 and axis 5 respectively correspond to this order of gene expression, C2<C3<C1<CTL,  
865 CTL=C2=C3<C1 and CTL<C1=C2<C3.

866 E. OPLS-DA analysis was performed to discriminate individual sample replicates based on the  
867 amount of mRNA expression obtained from indicated animals, through reverse transcription  
868 and NGS, and in a supervised manner. A 3D dot plot is presented showing the efficient replicate  
869 clustering and the discriminating power attributed to the first 3 predictors.

870 F. Using the predictor (x axis) that classified the samples in a classical dose-response, a bipartite  
871 view of enrichment network based on the 2000 most discriminating genes is represented. Small  
872 dots and large dots represent individual genes and enriched functions (KEGG based),

873 respectively. Genes or functions are encoded by a green-red scale according to their fold change  
874 or their p-value, respectively, as well as the direction (repressed-activated) of the regulation.  
875 Dot size of the functions represents the percentage of genes used and matching the full list  
876 associated to this function in the KEGG database. 3 clusters of functions are highlighted :  
877 I=Lipid metabolism, II=Xenobiotics response, III=mRNA metabolism and acute phase  
878 response.

879 **Figure 7.** Histological and physiological alterations induced by exposure to DPhP.

880 A. Liver sections at the indicated scale of mice exposed to the indicated concentration of DPhP  
881 or a vehicle were immunostained with the indicated antibodies. Star and hash denote the  
882 centrilobular and the portal area of the liver, respectively. Inset represents a 10x magnification  
883 of the source image.

884 B. Histogram quantifying IHC scores associated with Hmgcs staining of 5 animals in each  
885 indicated group (representative of two independent experiments, 2x5 animals). Score associated  
886 with the centrilobular and the portal area were dissociated as indicated. (-) = no to very low  
887 staining, (+) = low staining, (++) intermediate staining, (+++) = intense staining (see methods).

888 C. Histogram quantifying IHC scores associated with Perilipin 2 staining of 5 animals in each  
889 indicated group (representative of two independent experiments, 2x5 animals). Score associated  
890 with the intermediate zone and the portal area were dissociated as indicated (no staining was  
891 present in the zone contiguous to the centrilobular vein). (-) = no to very low staining, (+) = low  
892 staining, (++) intermediate staining, (+++) = intense staining (see methods).

893 D. Box and whisker plot quantifying the body weight of 10 animals representative of two  
894 independent experiments (2x5 animals), after 8 weeks of DPhP exposure at the indicated  
895 concentrations or with a vehicle. Outliers and significant p-values are indicated.

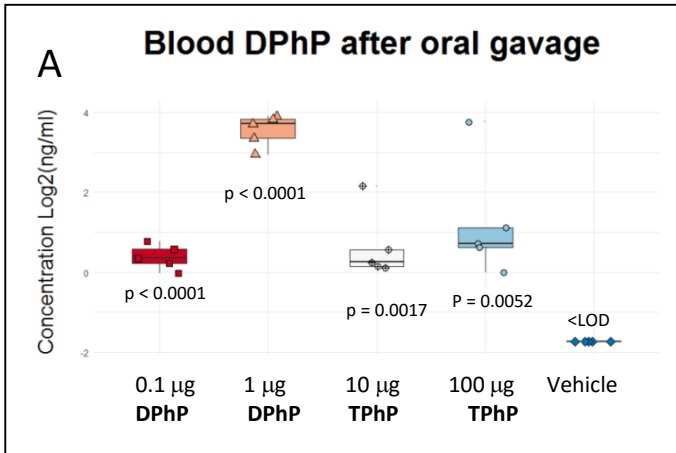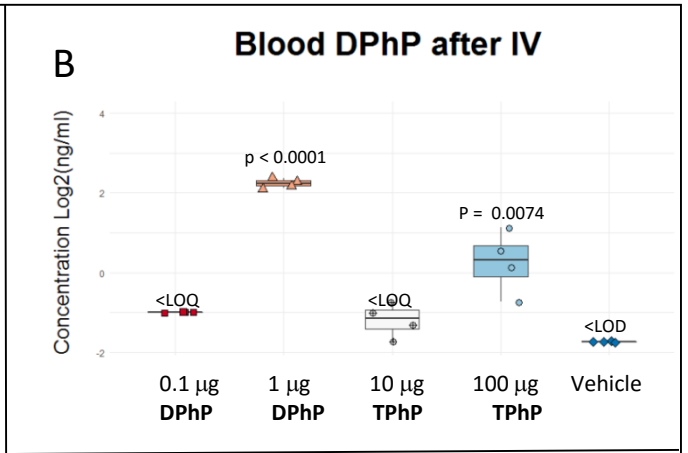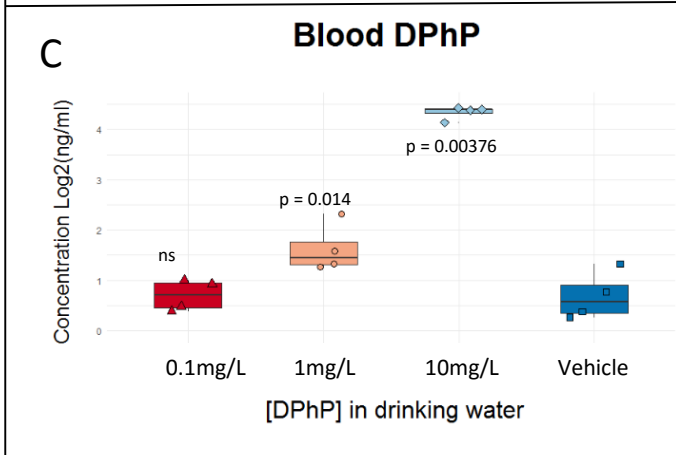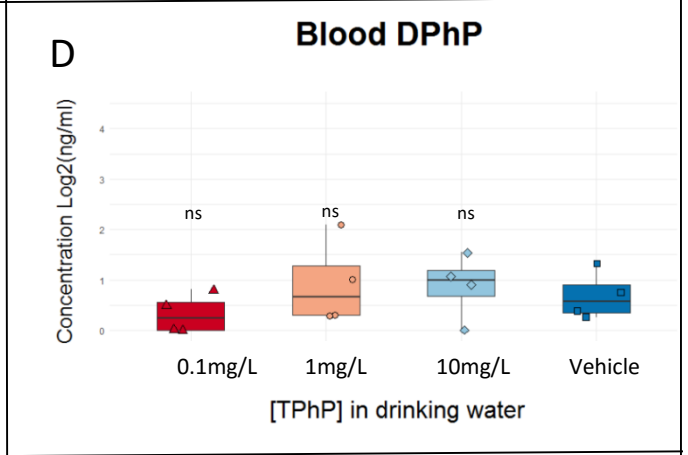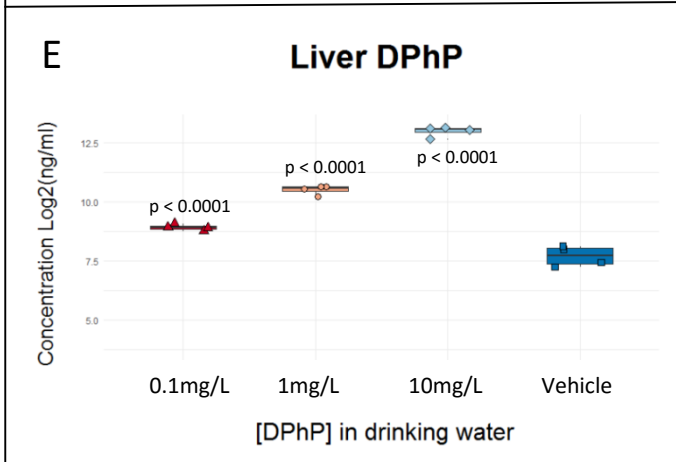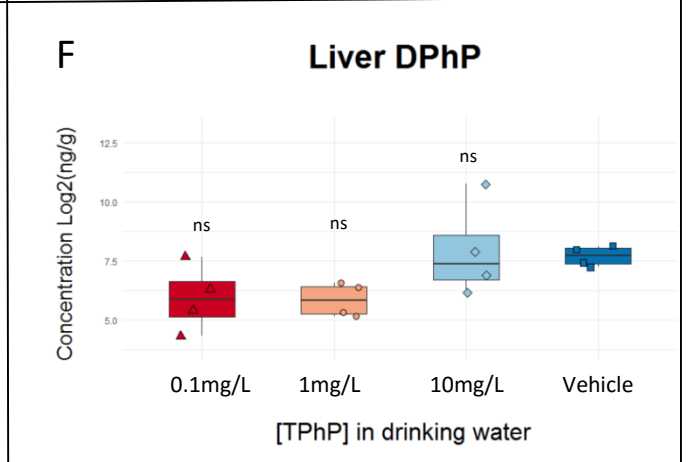

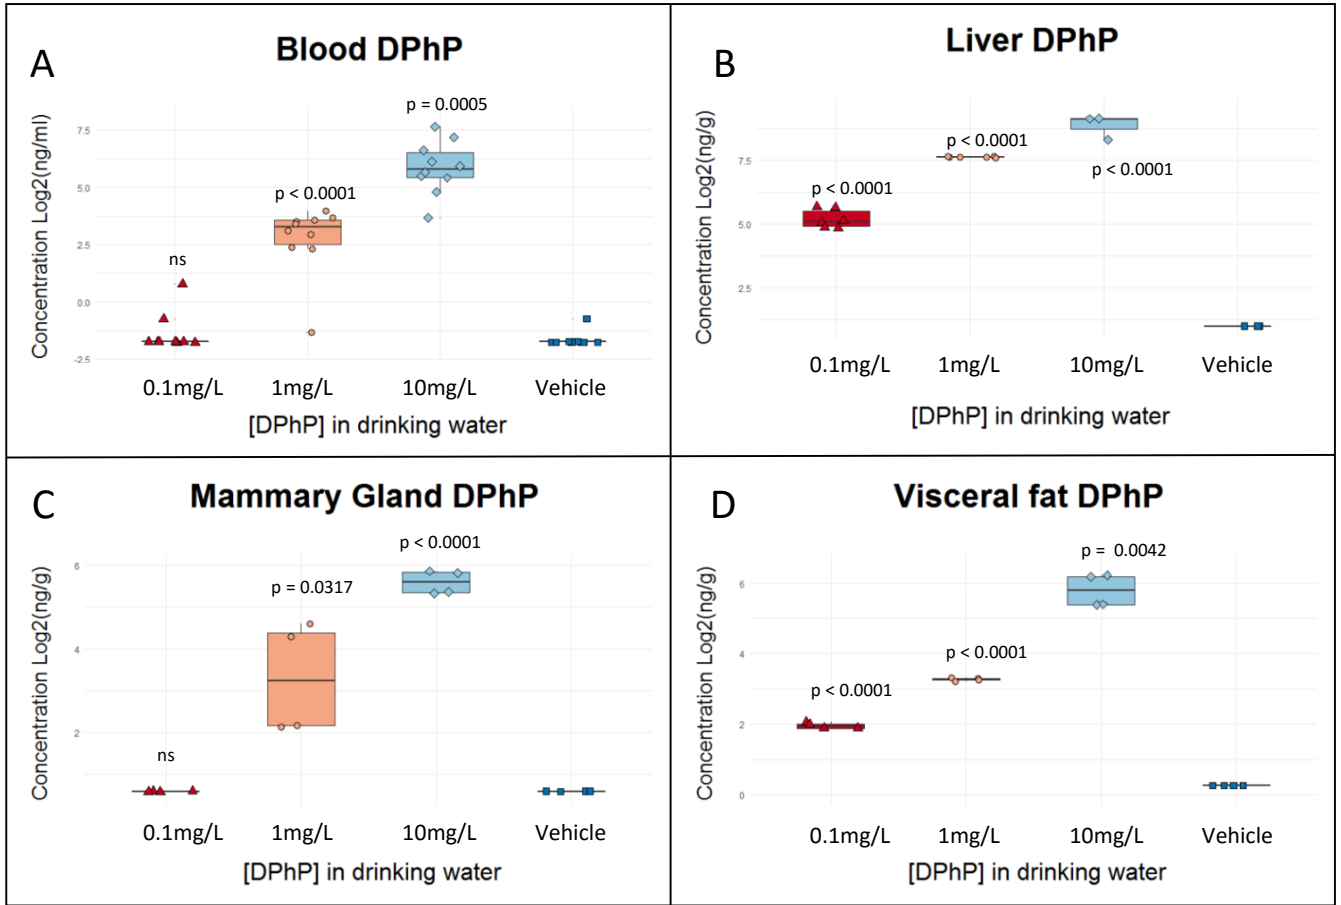

A

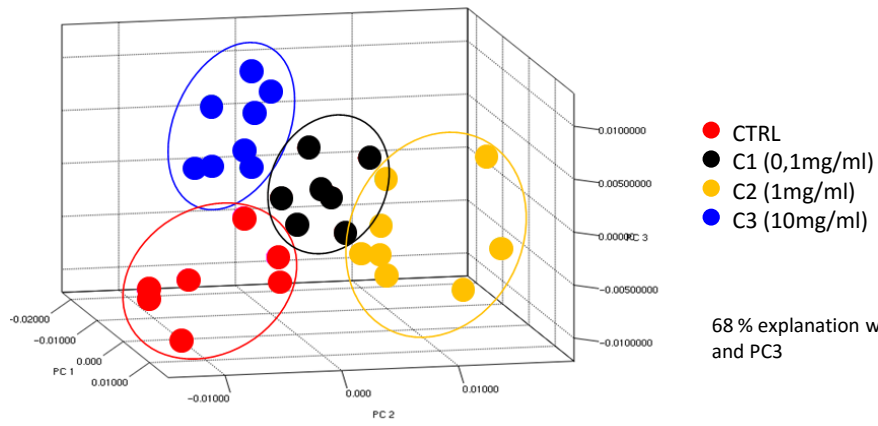

B

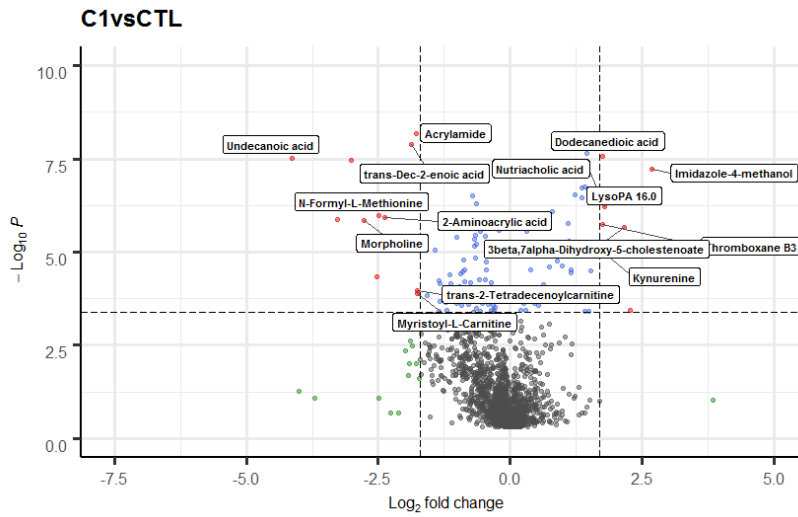

C

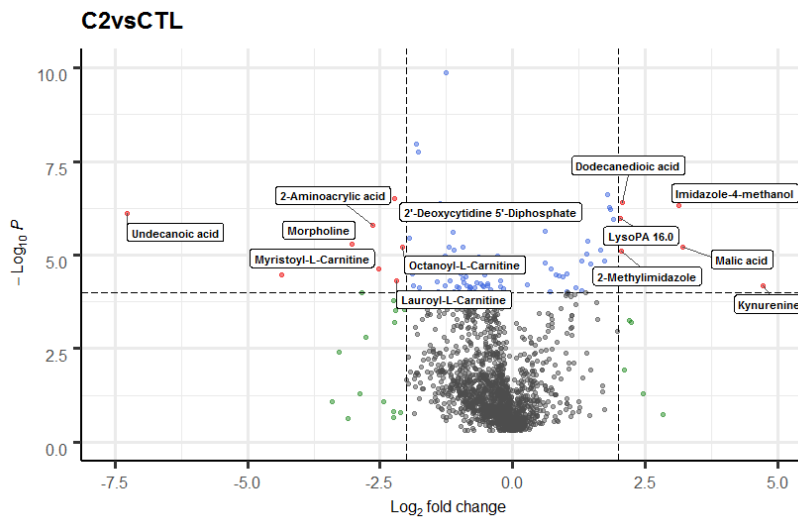

D

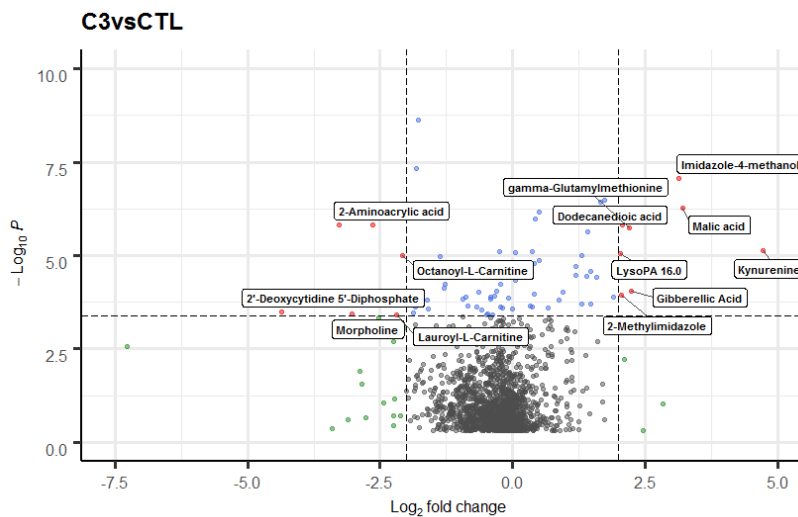

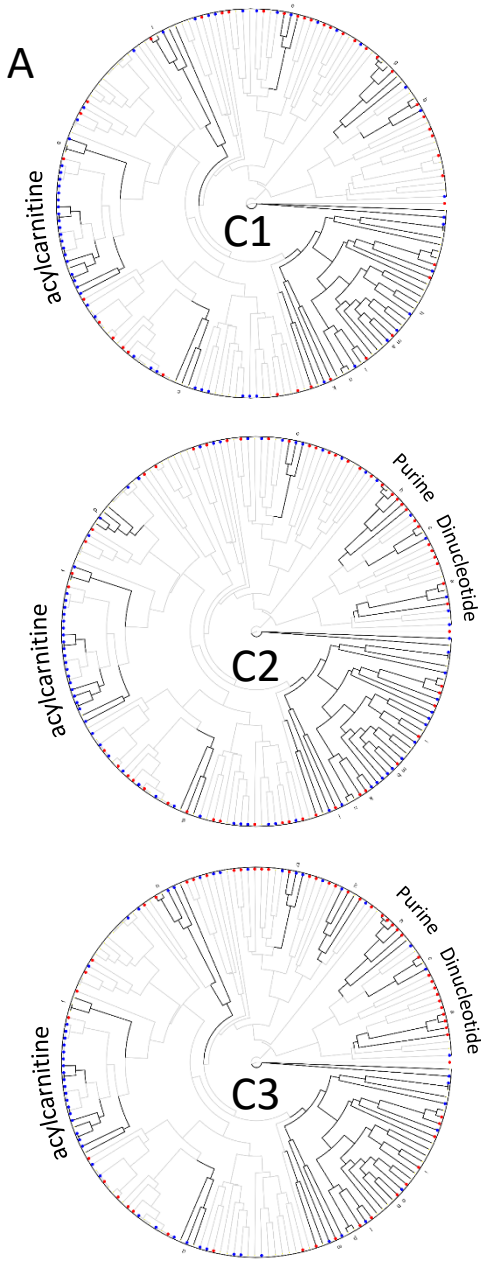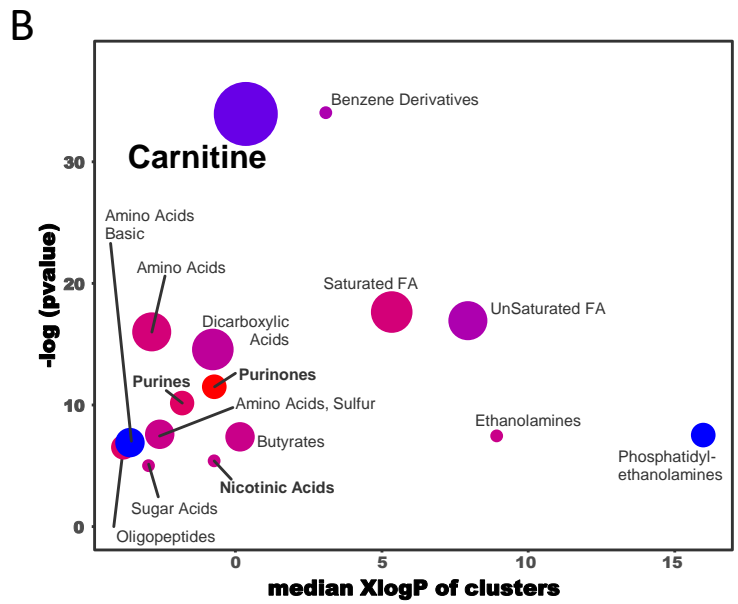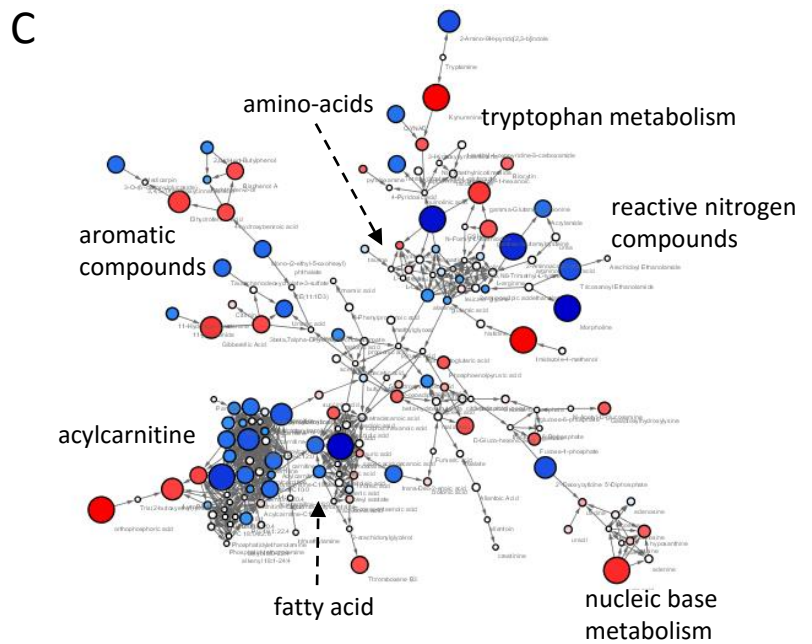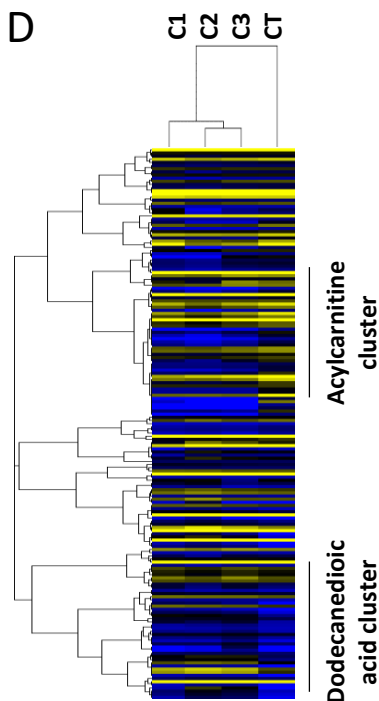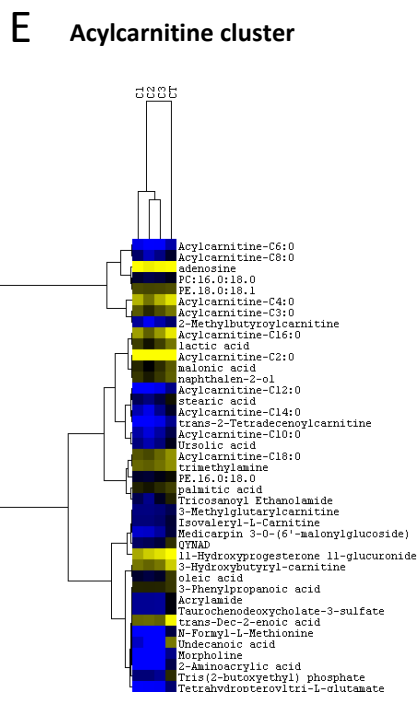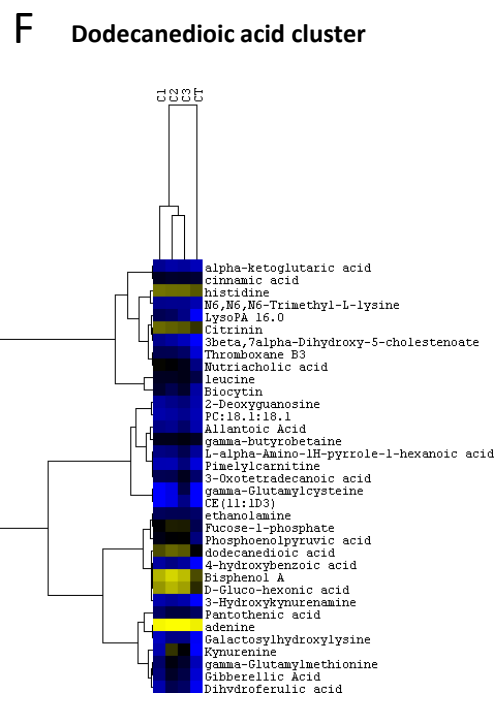

A

PCA (10700 genes considered. RPKM>0.2)

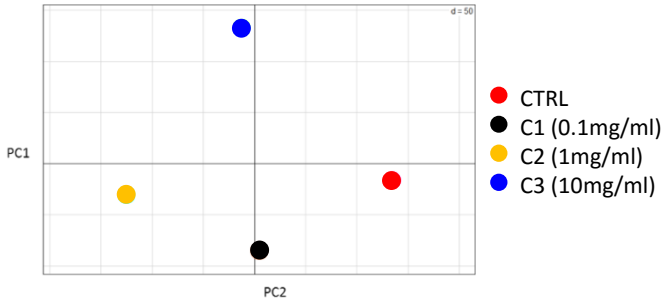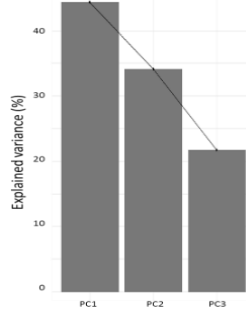

Scaling algorithm:  
unit variance  
77 % explanation  
with PC1 and PC2

B PCA Axis1

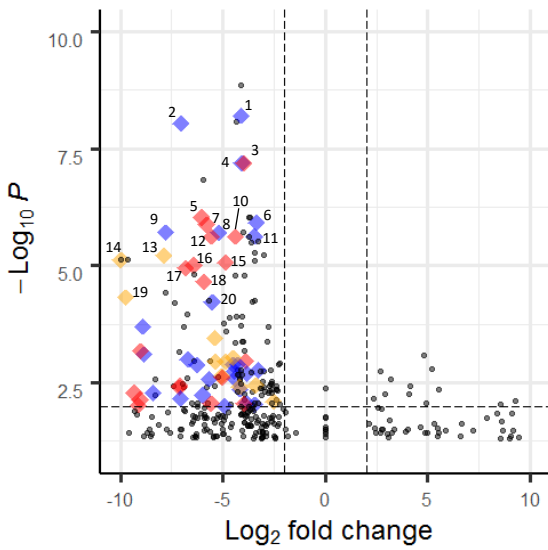

- 1/ Fatty acid metabolism (GO)
- 2/ Fatty acid metabolism (KEGG)
- 3/ Lipid catabolic process
- 4/ Monocarboxylic acid biosynthetic process
- 5/ Fatty acid oxidation
- 6/ Lipid localisation
- 7/ Lipid oxidation
- 8/ Fatty acid biosynthetic process
- 9/ Fatty acid elongation
- 10/ Fatty acid catabolic process
- 11/ Lipid transport
- 12/ Cellular lipid catabolic process
- 13/ Glucuronidation
- 14/ Xenobiotic glucuronidation
- 15/ Monocarboxylic acid catabolic process
- 16/ Fatty acid beta oxidation
- 17/ Propanoate metabolism
- 18/ Fatty acid degradation
- 19/ Cellular glucuronidation
- 20/ Unsaturated fatty acid metabolic process

C

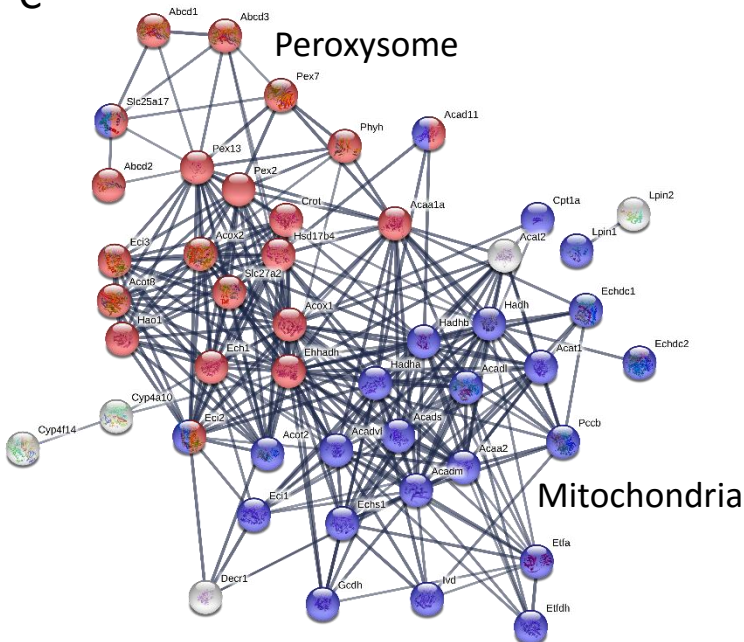

PCA axis 1 (Discriminating gene with eigen value>0.3)

“Fatty acid catabolic process”

String with high confidence (0.7)  
PPI enrichment p-value: < 1.0e-16  
Edge number : 284  
Node number : 58

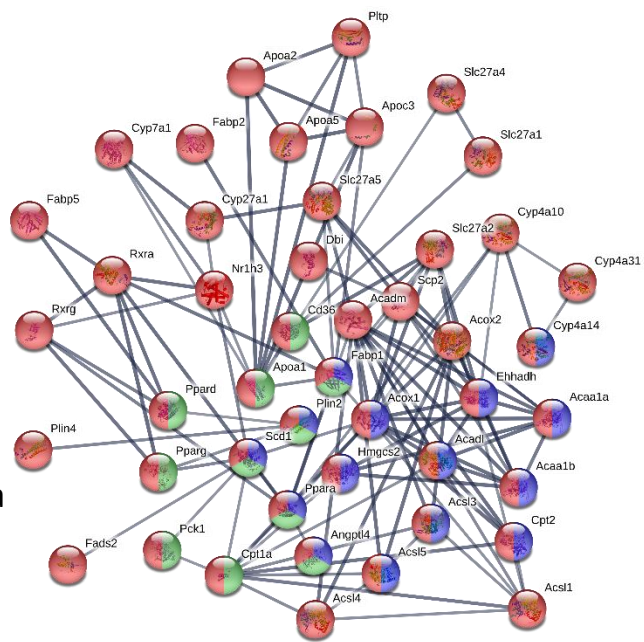

PCA axis 1 (Discriminating gene with eigen value>0.3)

“PPAR Signalling”

String with high confidence (0.7)  
PPI enrichment p-value: < 1.0e-16  
Edge number : 125  
Node number : 53

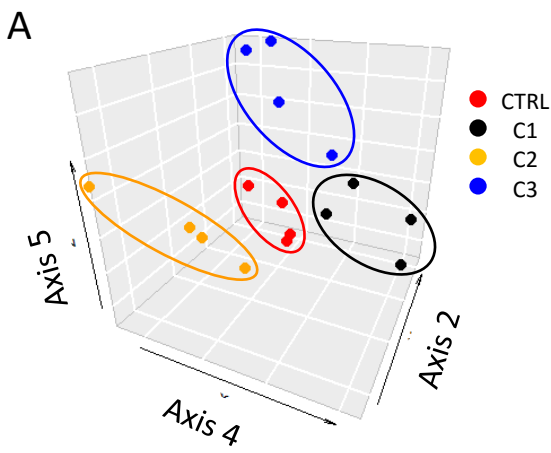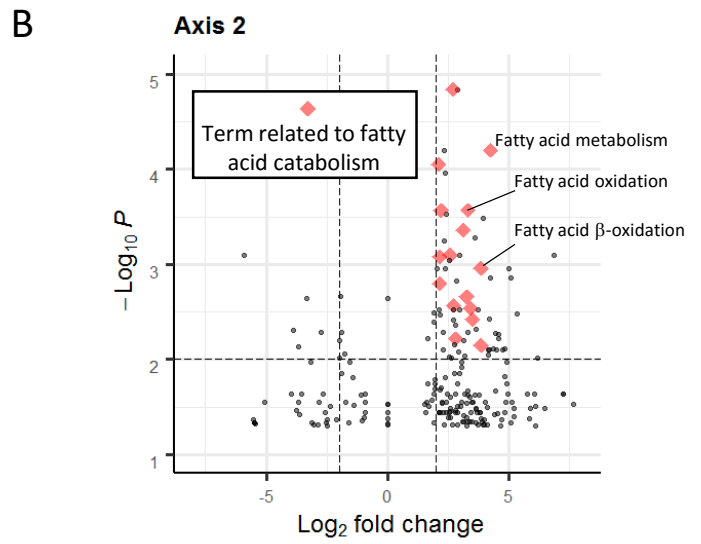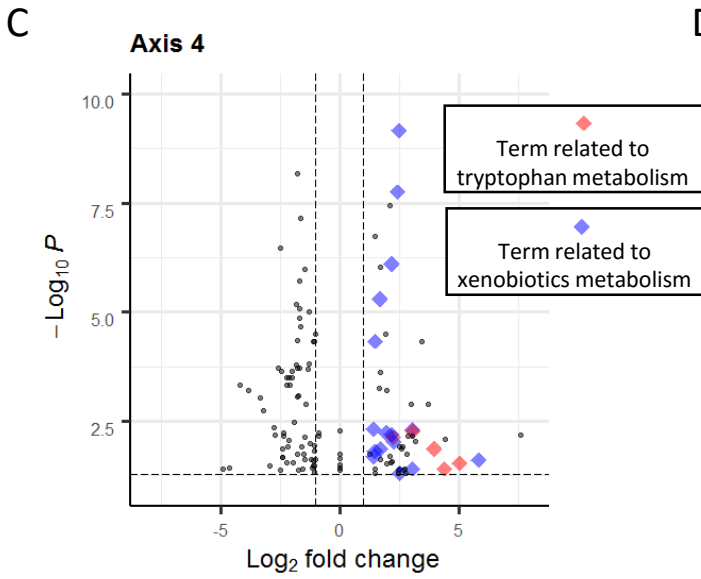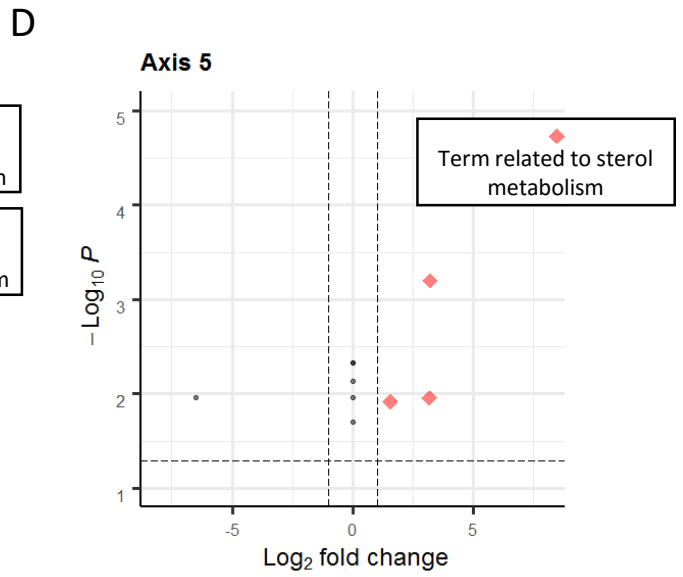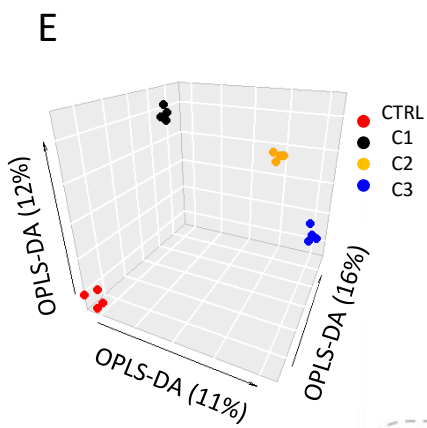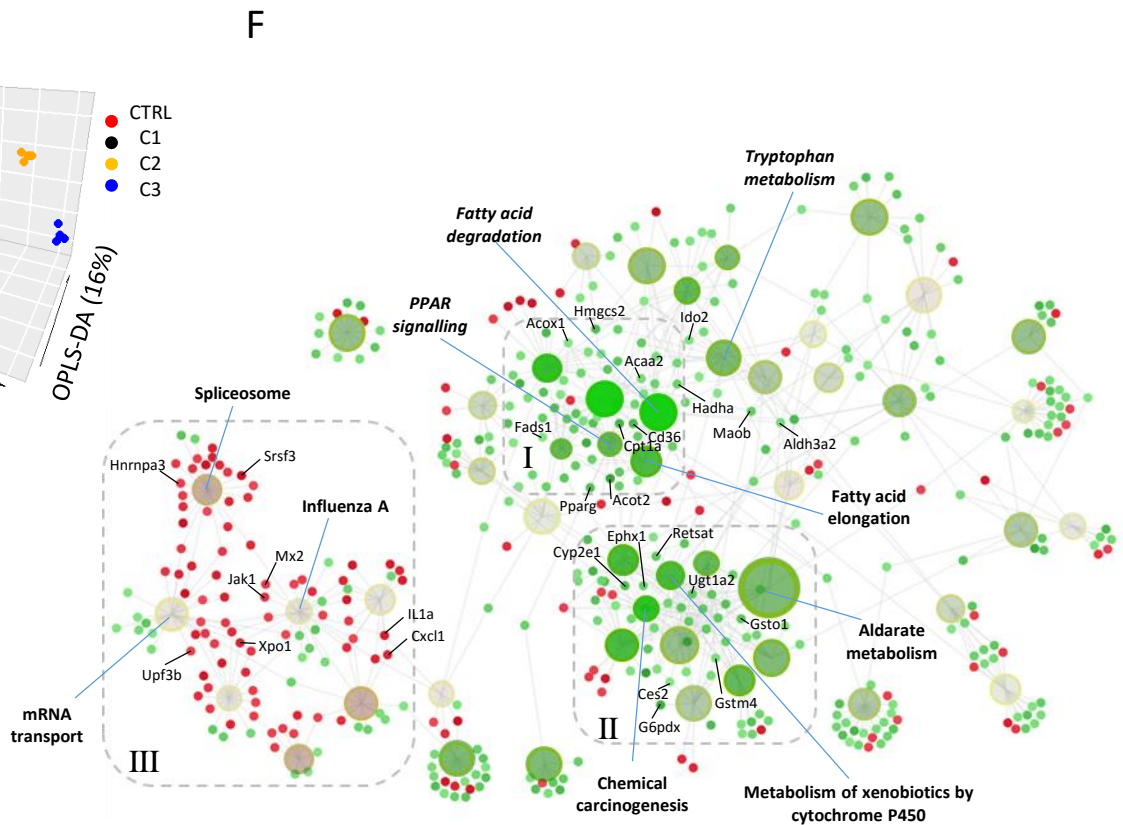



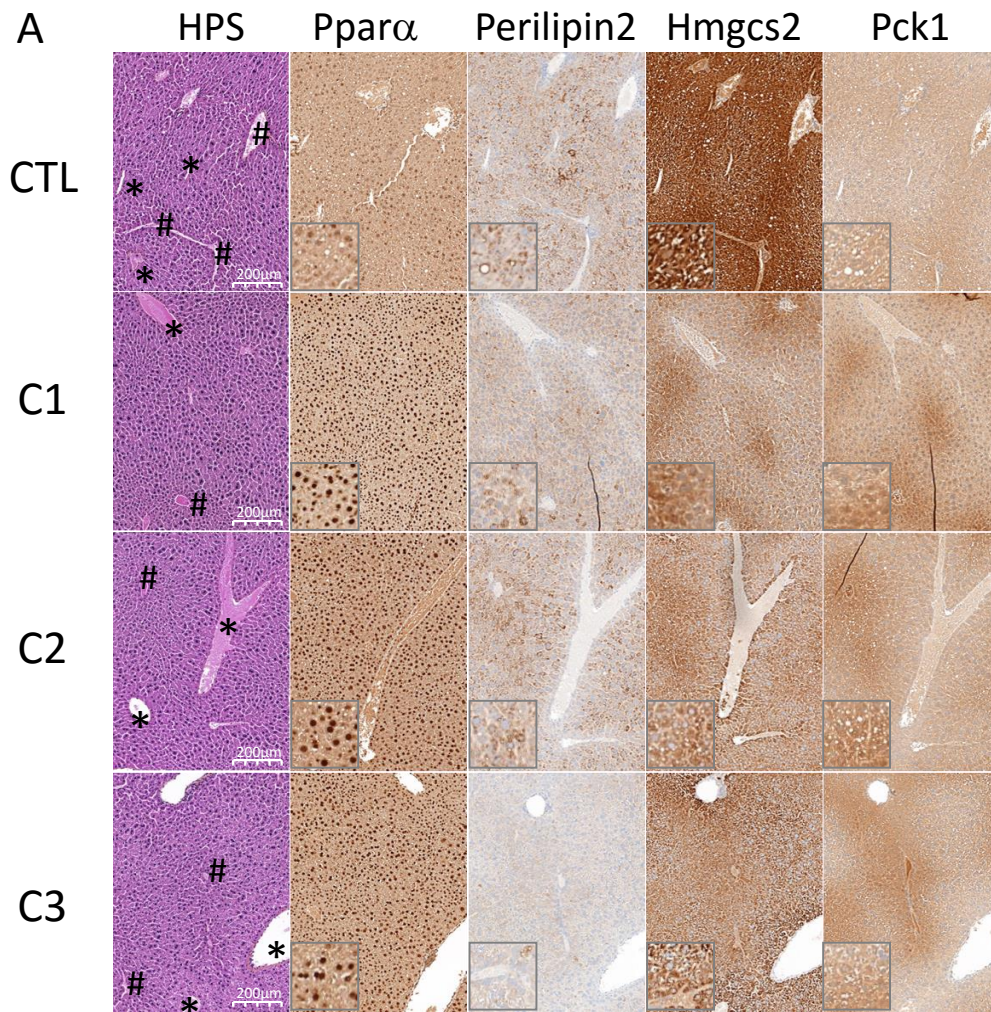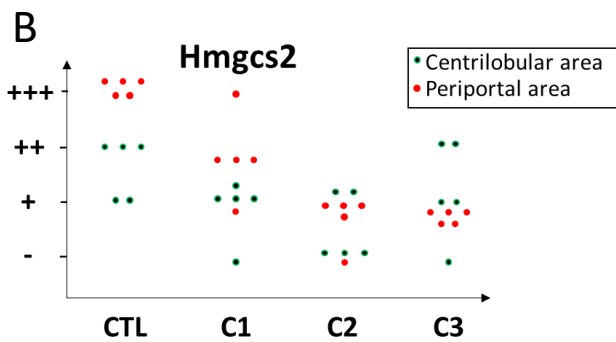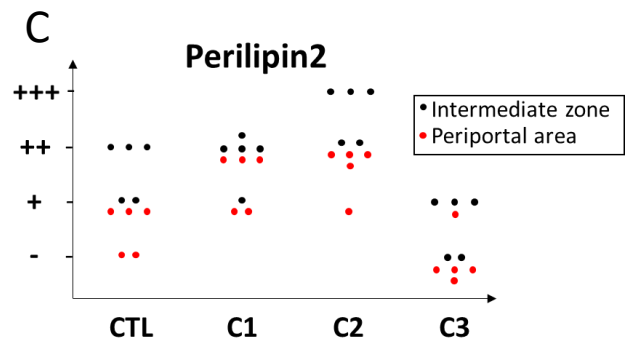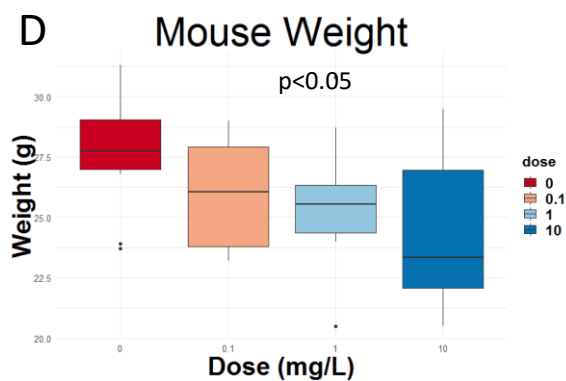

Source: https://www.biorxiv.org/content/10.1101/2019.12.26.888057v2.full.pdf
